## Sodium channel subpopulations with distinct biophysical properties and subcellular localization enhance cardiac conduction

Seth H. Weinberg<sup>1</sup>

1. *Department of Biomedical Engineering, The Ohio State University*

Running title: Sodium channel subpopulations enhance conduction

### Summary.

Sodium channels are organized in multiple “pools” with distinct biophysical properties and subcellular localization, but the role of these subpopulations is not well-understood. Computational modeling predicts that intercalated disk-localized sodium channels with shifted steady-state activation and inactivation voltage-dependence promote faster cardiac conduction.

### Abstract.

Sodium ( $\text{Na}^+$ ) current is responsible for the rapid depolarization of cardiac myocytes that triggers the cardiac action potential upstroke. Recent studies have illustrated the presence of multiple “pools” of  $\text{Na}^+$  channels with distinct biophysical properties and subcellular localization, including clustering of channels at the intercalated disk and along the lateral membrane. Computational studies predict that  $\text{Na}^+$  channel clusters at the intercalated disk can regulate cardiac conduction via modulation of the narrow intercellular cleft between electrically coupled myocytes. However, these studies have primarily focused on the redistribution of  $\text{Na}^+$  channels between intercalated disk and lateral membranes and not considered the distinct biophysical properties of the  $\text{Na}^+$  channel subpopulations. In this study, we simulate computational models of single cardiac cells and one-dimensional cardiac tissues to predict the functional consequence of distinct  $\text{Na}^+$  channel subpopulations. Single cell simulations predict that a subpopulation of  $\text{Na}^+$  channels with shifted steady-state activation and inactivation voltage-dependency promote an earlier action potential upstroke. In cardiac tissues that account for distinct subcellular spatial localization, simulations predict that “shifted”  $\text{Na}^+$  channels contribute to faster and more robust conduction, with regards to sensitivity to tissue structural changes (i.e., cleft width), gap junctional coupling, and rapid pacing rates. Simulations predict that the intercalated disk-localized shifted  $\text{Na}^+$  channels provide a disproportionately larger contribution to total  $\text{Na}^+$  charge, relative to lateral membrane-localized  $\text{Na}^+$  channels. Importantly, our work supports the hypothesis that  $\text{Na}^+$

channel redistribution may be a critical mechanism by which cells can rapidly respond to perturbations to support fast and robust conduction.

## INTRODUCTION

Sodium ( $\text{Na}^+$ ) ionic current carried by voltage-gated  $\text{Na}^+$  channels (Nav) are primarily responsible for driving propagation of electrical activity in the heart.  $\text{Na}^+$  current ( $I_{\text{Na}}$ ) drives the rapid depolarization of myocytes that triggers the upstroke of the cardiac action potential (AP).  $I_{\text{Na}}$  dysfunction can result in pathological conditions associated with both pathological conduction and repolarization, including Brugada syndrome, long QT syndrome, atrial fibrillation, sick sinus syndrome, and heart failure<sup>1-3</sup>. As such, the proper expression and regulation of voltage-gated  $\text{Na}^+$  channels in the heart is essential for healthy cardiac function. The primary voltage-gated  $\text{Na}^+$  channel in cardiac myocytes is Nav1.5. A wide range of proteins have been identified to interact and regulate Nav1.5<sup>1-3</sup>. Different interacting proteins have been found to impact expression, trafficking, internalization, phosphorylation, and modulation of channel biophysical properties. Additionally, Nav1.5 is known to associate with potentially four different  $\beta$  subunits, which can also impact channel surface expression and biophysical properties, in addition to playing a role in cellular adhesion<sup>4-7</sup>.

Over the past two decades, multiple studies have provided evidence supporting the existence of so-called “multiple pools” of Nav1.5 in cardiac myocytes, with distinct subcellular localization, specifically referred to different subpopulations of  $\text{Na}^+$  channels localized at the intercalated disk (ID), i.e., at the cell-cell junctions, and at the lateral membrane<sup>3,8-10</sup>. Note that evidence has also suggested a third distinct subpopulation of  $\text{Na}^+$  channels in the transverse tubules; however, in this study, we primarily focus on ID- and lateral membrane-localized  $\text{Na}^+$  channels. In addition to distinct subcellular localization, these subpopulations associate with different interacting and scaffolding proteins, which supports the potential for these subpopulations to exhibit distinct biophysical properties. Indeed, macropatch measurements from Lin and colleagues showed that the ID-localized  $I_{\text{Na}}$  steady-state activation (SSA) and inactivation (SSI) voltage-dependence are shifted, compared with lateral membrane-localized  $I_{\text{Na}}$ <sup>11</sup>. While the multiple Nav1.5 pool conceptual model is well-demonstrated across different experimental measurements, including imaging studies, protein pull-down experiments, and patch clamp<sup>9,11-15</sup>, the functional roles of these distinct subpopulations are not fully appreciated.

Although it is difficult to quantify the relative fraction of ID vs. lateral membrane-localized  $\text{Na}^+$  channels or  $I_{\text{Na}}$ , measurements from Lin et al suggest that the majority of  $I_{\text{Na}}$  (relative to the entire cell) is localized at the ID. Computational modeling studies have provided strong evidence for the function role of these ID-localized  $\text{Na}^+$  channels in supporting and modulating electrical conduction<sup>16-18</sup>. At the ID, Nav1.5 has been shown to cluster with electrical and mechanical

junctional proteins, primarily connexin-43 (Cx43) in the ventricles and N-cadherin, respectively, which results in the close apposition of Na<sup>+</sup> channel-dense ID membranes, separated by a narrow (on the order of 5-50 nm) inter-cellular cleft space. These conditions, specifically the clustering of interacting channels adjacent to a narrow cleft space, support so-called “ephaptic coupling,” a cell-cell coupling mechanism predicted to occur in cardiac myocytes and other excitable cells<sup>16-19</sup>, such as neurons<sup>20</sup>.

In brief, this mechanism of ephaptic coupling can be described as follows: Consider electrical propagation between two coupled cells, cell 1 and cell 2, for which cell 1 is “upstream” of cell 2, i.e., propagation proceeds from cell 1 to cell 2. In cell 1, rapid inward I<sub>Na</sub> at the ID membrane during the AP upstroke drives an increase in cell 1 intracellular potential; concurrently this same pre-junctional I<sub>Na</sub> results in a hyperpolarization of the inter-cellular cleft space between the two cells. This cleft hyperpolarization increases the transmembrane potential across the post-junctional ID membrane in cell 2, which can promote early activation of the cell 2 post-junctional I<sub>Na</sub>. This cell-cell coupling occurs in parallel with direct electrical current flowing from cell 1 to cell 2 via gap junctions. The role of ephaptic coupling in cardiac electrical propagation was proposed over 50 years ago<sup>21-24</sup>, and subsequent computational studies have predicted that conduction depends on key properties governing ephaptic coupling, including the width of the inter-cellular cleft space and the relative fractions of I<sub>Na</sub> at the ID and the lateral membrane<sup>12,16-18,25-42</sup>. As the clustering of Na<sup>+</sup> channels at the ID occurs in conjunction with gap junctions, it is difficult to experimentally separate the relative contribution of gap junction and ephaptic coupling mechanisms, motivating computational modeling studies.

In a seminal study, Kucera and colleagues demonstrated that the impact of ephaptic coupling depended on the relative strength of gap junctional coupling<sup>16</sup>. Specifically, a narrow cleft space (thus promoting ephaptic coupling) enhances conduction for weaker gap junctional coupling, due to the earlier activation of post-junctional ID I<sub>Na</sub> (which was later termed “self-activation”<sup>40</sup>). However, for stronger gap junctional, a narrow cleft can slow conduction, as the cleft hyperpolarization and post-junctional ID transmembrane potential depolarization can ultimately result in a smaller I<sub>Na</sub> driving force, which in turn reduces peak I<sub>Na</sub> and thus slows conduction, which was termed “self-attenuation.”<sup>16</sup> Subsequent studies have found that conduction due to ephaptic coupling can further depend on additional properties, such as the relative fraction of ID-localized I<sub>Na</sub> and total I<sub>Na</sub> conductance (across the whole cell)<sup>25</sup>, and structural properties, including heterogeneous structure within different regions of the ID<sup>26,40-42</sup>, separation between Na<sup>+</sup> channels and gap junctions on the ID membrane<sup>40,42</sup>, and cell size<sup>25</sup>.

While these computational studies have provided important insights and predictions as to how the subcellular distribution of Na<sup>+</sup> channels can influence cardiac conduction via ephaptic and

gap junctional coupling, all of these prior studies have assumed that the biophysical properties of Na<sup>+</sup> channels localized at the ID and lateral membrane are the same. In this study, we perform a series of simulations in both single cells and tissue to predict the impact of subpopulations of Na<sup>+</sup> channels with distinct biophysical properties on cardiac conduction. In tissue simulations, we consider several different subcellular distributions to identify the contributions of Na<sup>+</sup> channels with distinct spatial localization, Na<sup>+</sup> channels with shifted biophysical properties, and the contribution of both occurring in tandem. Collectively, our results support the conclusion that ID-localized Na<sup>+</sup> channels with shifted biophysical properties enhance cardiac conduction, with enhanced sensitivity to cleft width changes (and thus greater adaptability to ID structural perturbations). Further, while simulations predict that lateral membrane-localized Na<sup>+</sup> channels do contribute the total cell I<sub>Na</sub>, ID-localized Na<sup>+</sup> channels provide the greatest contribution to the total Na<sup>+</sup> charge, a property which is enhanced for weaker gap junctional coupling.

## METHODS

### ***Na<sup>+</sup> channel biophysical properties.***

Simulations were performed in single cells and a one-dimensional tissue. We utilize the well-established Luo-Rudy 1991 (LR1) model<sup>43</sup> to represent ionic current dynamics. All currents, except Na<sup>+</sup> as described here, are unchanged from the original model. Pertinent to this study, Na<sup>+</sup> channel dynamics are governed by activation, fast inactivation, and slow inactivation gates, represented by gating variables  $m$ ,  $h$ , and  $j$ , respectively. These gating variables follow typical Hodgkin-Huxley type kinetics,

$$\frac{dx^{pop}}{dt} = \frac{x_{\infty}^{pop} - x^{pop}}{\tau_x^{pop}}, \text{ for } x \in \{m, h, j\} \text{ and } pop \in \{base, shift\}, \quad (1)$$

where gating variable steady-state  $x_{\infty}^{pop} = \alpha_x^{pop} / (\alpha_x^{pop} + \beta_x^{pop})$  and time constant  $\tau_x^{pop} = 1 / (\alpha_x^{pop} + \beta_x^{pop})$  exhibit voltage-dependence through rates,  $\alpha_x^{base} = \alpha_x(V)$  and  $\beta_x^{base} = \beta_x(V)$ , the superscript “base” here refers to the baseline model, and the functions  $(\alpha_x(V), \beta_x(V))$  are the nominal LR1 model voltage-dependent rate functions. The steady-state activation (SSA)  $m_{\infty}^{base}(V)$  and inactivation (SSI)  $h_{\infty}^{base}(V)$  (which is equivalent to  $j_{\infty}^{base}(V)$ ) curves are shown as functions of voltage for the baseline model parameters in Figure 1A (blue).

To account for a subpopulation of Na<sup>+</sup> channels with different biophysical properties, we define a fraction of I<sub>Na</sub> current governed by “shifted” steady-state (and time constant) voltage-dependence. Specifically, we define the activation rates  $\alpha_m^{shift} = \alpha_m(V - V_{act}^{shift})$  and  $\beta_m^{shift} = \beta_m(V - V_{act}^{shift})$ , and the inactivation rates  $\alpha_h^{shift} = \alpha_h(V - V_{inact}^{shift})$ ,  $\beta_h^{shift} = \beta_h(V - V_{inact}^{shift})$ ,  $\alpha_j^{shift} = \alpha_j(V - V_{inact}^{shift})$ , and  $\beta_j^{shift} = \beta_j(V - V_{inact}^{shift})$ . Based on measurements of the steady-state activation and inactivation curves from Lin et al<sup>11</sup>, we define  $V_{act}^{shift} = -5.5 \text{ mV}$  and  $V_{inact}^{shift} = 7.8 \text{ mV}$ . The shifted steady-state activation  $m_{\infty}^{shift}(V)$  and inactivation  $h_{\infty}^{shift}(V)$

curves are shown for the shifted model parameters in Figure 1A (red). Note to account for differences in species and other experimental conditions, we incorporate the relative shift in SSA and SSI between ID and lateral membrane  $I_{Na}$ , not the exact values for half-activation or -inactivation, from Lin et al<sup>11</sup>.

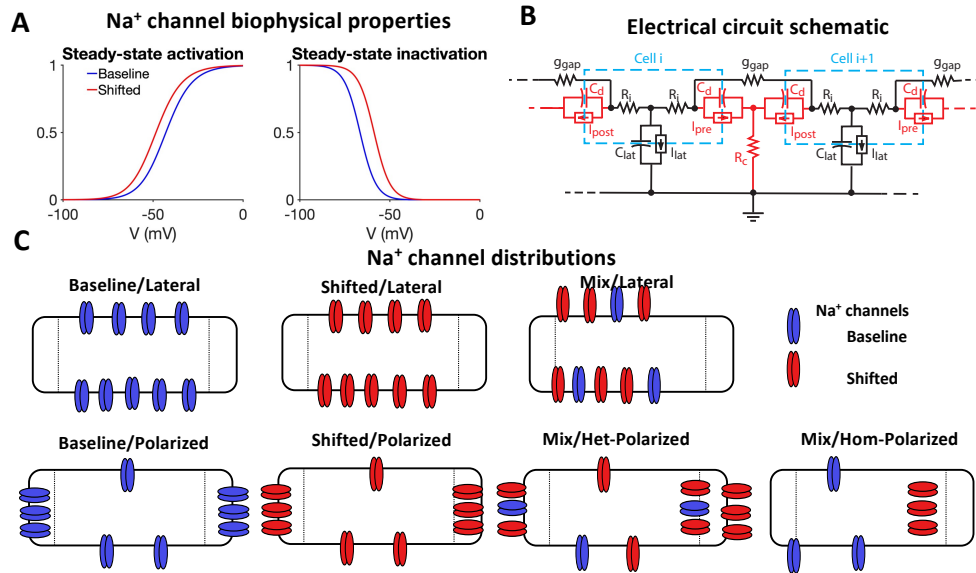

Figure 1.  $Na^+$  channel biophysical properties, electrical circuit representation, and spatial distributions. (A) The steady-state activation (left) and inactivation (right) curves, as functions of voltage  $V$ , are shown for the baseline (blue) and shifted (red)  $I_{Na}$  subpopulations. (B) Electrical circuit representation of the one-dimensional tissue model (see text for circuit element description). (C) Diagrams of the localization of baseline (blue) and shifted (red)  $Na^+$  channels for the 7  $Na^+$  channel distributions considered. Note that the distributions in (C) correspond with  $f_{Na} = 2/3$ .

### Single cell and tissue models.

In single cell simulations, we simulate the LR1 model, replacing the nominal model  $Na^+$  current,  $I_{Na}$  (comprised of 100% baseline  $I_{Na}$ ) with a sum of baseline and shifted  $I_{Na}$ . We define the parameter  $f_{Na}$ , which refers to the fraction of the total  $Na^+$  current *conductance* that has the shifted biophysical properties. That is,

$$I_{Na} = I_{Na}^{base} + I_{Na}^{shift}, \quad (2a)$$

where

$$I_{Na}^{base} = (1 - f_{Na})g_{Na}m^{base}h^{base}j^{base}(V - E_{Na}), \quad (2b)$$

$$I_{Na}^{shift} = f_{Na}g_{Na}m^{shift}h^{shift}j^{shift}(V - E_{Na}), \quad (2c)$$

$g_{Na}$  is the total sodium conductance and  $E_{Na}$  is the sodium reversal potential. Importantly, we highlight that, while these single cell simulations account for varying proportions of the two subpopulations with baseline and shifted  $I_{Na}$  biophysical properties, they do not account for different spatial localization of the subpopulations.

To investigate the impact of Na<sup>+</sup> channel subpopulations with distinct biophysical properties and subcellular spatial locations, we simulate a tissue model of a one-dimensional chain of 50 cells, previously used by us and others<sup>16,25,27,30,38</sup>, which accounts for gap junction and ephaptic coupling (Figure 1B). We account for non-uniform spatial localization of Na<sup>+</sup> channels by spatially discretizing each cell into three membrane “patches,” specifically the post-junctional, lateral, and pre-junctional membranes, with total membrane currents denoted as  $I_{post}$ ,  $I_{lat}$ , and  $I_{pre}$ , respectively. Thus, each cell is represented by three intracellular nodes, with intracellular resistance modeled by two resistors,  $R_i = \rho_i L / (2\pi r^2)$ , where  $L$  is the cell length of 100  $\mu\text{m}$ ,  $r$  is the cell radius of 11  $\mu\text{m}$ , and intracellular resistivity  $\rho_i = 150 \Omega \cdot \text{cm}$ . Capacitance of each membrane is proportional to surface area, such that the lateral membrane capacitance  $C_{lat} = 2\pi r L c_m$  and pre- and post-junctional intercalated disk membrane capacitance  $C_d = \pi r^2 c_m$ , where capacitance per unit area  $c_m = 1 \mu\text{F}/\text{cm}^2$ .

The dynamics of the intercellular cleft voltage (between adjacent cells) are governed by the corresponding pre- and post-junctional membrane currents  $I_{pre}$  and  $I_{post}$ , respectively, and the cleft radial resistance<sup>16</sup>  $R_c = \rho_{cl} / (8\pi w)$ , where  $w$  is the cleft width (varied between 5-60 nm)<sup>4,12,30,44</sup>, and cleft resistivity  $\rho_{cl} = 150 \Omega \cdot \text{cm}$ . Thus, cleft resistivity and width are inversely related. Gap junctional coupling is represented by a resistor, with conductance  $g_{gap}$ , directly connecting pre- and post-junctional intracellular spaces. In this study, we vary  $g_{gap}$  from 7.67 to 767 nS<sup>45–55</sup>.

### **Na<sup>+</sup> channel distributions.**

Estimates based on macropatch measurements suggest that between 50-90% of Na<sup>+</sup> current is localized at the ID<sup>11</sup>; therefore, in this study, we consider different values for the fraction of current with shifted  $I_{Na}$  and for the fraction of current localized at the ID junctional membranes. Parameter  $f_{Na}$  defines the fraction of shifted  $I_{Na}$  and/or the fraction of junctional membrane-localized  $I_{Na}$ , depending on the Na<sup>+</sup> channel distribution, as described below and in Table 1.

We consider 7 distinct Na<sup>+</sup> channel distributions, which collectively enable a thorough investigation of the role of different  $I_{Na}$  biophysical properties and spatial localization (Figure 1C), where we denote the fraction of the total Na<sup>+</sup> current conductance of each  $I_{Na}$  subpopulation on each membrane: (i) Baseline/Lateral – all baseline  $I_{Na}$  localized on the lateral membrane; (ii) Shifted/Lateral – all shifted  $I_{Na}$  localized on the lateral membrane; (iii) Mix/Lateral – a mix of  $f_{Na}$  shifted  $I_{Na}$  and  $(1-f_{Na})$  baseline  $I_{Na}$  subpopulations, all localized on the lateral membrane; (iv) Baseline/Polarized –  $(1-f_{Na})$  baseline  $I_{Na}$  localized on the lateral membrane and  $f_{Na}$  baseline  $I_{Na}$  localized on junctional membranes; (v) Shifted/Polarized –  $(1-f_{Na})$  shifted  $I_{Na}$  localized on the lateral membrane and  $f_{Na}$  shifted  $I_{Na}$  localized on junctional membranes; (vi) Mix/Heterogeneous-Polarized –  $(1-f_{Na})^2$  baseline  $I_{Na}$  and  $f_{Na}(1-f_{Na})$  shifted  $I_{Na}$  localized on the lateral membrane, and

$f_{Na}(1-f_{Na})$  baseline  $I_{Na}$  and  $f_{Na}^2$  localized on the junctional membrane; and (vii) Mix/Homogeneous-Polarized –  $(1-f_{Na})$  baseline  $I_{Na}$  localized on the lateral membrane and  $f_{Na}$  shifted  $I_{Na}$  localized on the junctional membrane. Note the junctional  $I_{Na}$  is evenly split between the pre- and post-junctional membranes. The fraction of the total  $Na^+$  current conductance of each  $I_{Na}$  subpopulation on each membrane is shown in Table 1, with the specific  $f_{Na} = 0.7$  shown for clarity.

We highlight that the Mix/Homogeneous-Polarized distribution is consistent with a physiological representation of the  $I_{Na}$  distribution, specifically channels with shifted biophysical properties localized at the junctional membranes, while channels with baseline properties are localized on the lateral membrane. In contrast, the Baseline/Lateral distribution represents the typical model assumption, i.e., consistent with the standard monodomain model, in which all  $I_{Na}$  is represented with baseline biophysical properties and localized on the lateral membrane. The Baseline/Polarized distribution is consistent prior studies of ephaptic coupling, in which a fraction of  $Na^+$  channels are localized at the junctional membranes but with the same  $I_{Na}$  biophysical properties as channels localized on the lateral membrane. We also highlight the difference between the Mix/Heterogeneous-Polarized and Mix/Homogeneous-Polarized distributions. The later distribution, again representing physiological conditions, and the former distribution both have the same total fraction of  $I_{Na}$  with shifted biophysical properties and the same total fraction of  $I_{Na}$  localized at the junctional membranes. However, the Heterogeneous distribution has a mix of both  $I_{Na}$  subpopulations on both the lateral and junctional membranes, while for the Homogeneous distribution, the two  $I_{Na}$  subpopulations are localized in spatially distinct regions. Importantly, unless otherwise stated, the total  $I_{Na}$  conductance (for a given cell) is the same for all 7  $Na^+$  channel distributions, with the differences only arising due to the  $I_{Na}$  subpopulations and subcellular localization.

| Distribution            | Baseline $I_{Na}$ on Lateral Membrane | Shifted $I_{Na}$ on Lateral Membrane | Baseline $I_{Na}$ on Junctional Membranes | Shifted $I_{Na}$ on Junctional Membranes |
|-------------------------|---------------------------------------|--------------------------------------|-------------------------------------------|------------------------------------------|
| (i) Baseline/Lateral    | 1                                     | 0                                    | 0                                         | 0                                        |
| (ii) Shifted/Lateral    | 0                                     | 1                                    | 0                                         | 0                                        |
| (iii) Mix/Lateral       | $0.3 (1-f_{Na})$                      | $0.7 (f_{Na})$                       | 0                                         | 0                                        |
| (iv) Baseline/Polarized | $0.3 (1-f_{Na})$                      | 0                                    | $0.7 (f_{Na})$                            | 0                                        |
| (v) Shifted/Polarized   | 0                                     | $0.3 (1-f_{Na})$                     | 0                                         | $0.7 (f_{Na})$                           |
| (vi) Mix/Het-Polarized  | $0.09 (1-f_{Na})^2$                   | $0.21 [f_{Na} (1-f_{Na})]$           | $0.21 [f_{Na} (1-f_{Na})]$                | $0.49 (f_{Na})^2$                        |
| (vii) Mix/Hom-Polarized | $0.3 (1-f_{Na})$                      | 0                                    | 0                                         | $0.7 (f_{Na})$                           |

Table 1. Values for the fraction of baseline and shifted  $I_{Na}$  on the lateral and junctional membranes for the 7  $Na^+$  channel distributions investigated in tissue simulations, shown for a representative example of  $f_{Na} = 0.7$ .

### **Simulations and numerical methods.**

Numerical experiments were performed by varying key model parameters in single cell and tissue simulations. In single cells, we vary the fraction of shifted  $I_{Na}$  ( $f_{Na}$ ) and quantify the  $I_{Na}$  peak and



total  $\text{Na}^+$  charged carried  $Q_{\text{Na}}$ . In tissue, we vary the  $\text{Na}^+$  channel distributions, cleft width  $w$ , gap junction conductance  $g_{\text{gap}}$ , and the fraction of  $\text{Na}^+$  channels with shifted biophysical properties and localized at the junctional membranes ( $f_{\text{Na}}$ ), as described in Table 1. For each tissue simulation, we quantify the conduction velocity (CV), and in a subset of simulations, the total charged carried by  $I_{\text{Na}}$  on the lateral and junctional membranes. Unless otherwise stated, CV was measured following electrical wave initiation from resting conditions.

In single cell simulations, electrical activity initiated an applied stimulus of 1-ms duration for a cycle length of 500 ms. In tissue, a propagating wave was initiated by simulating cells 1-5. For each simulation, activation time was calculated as the first time the intracellular voltage increases above -60 mV for each cell or membrane patch (in tissue). CV was calculated by measuring the difference in activation time between the middle 50% of the one-dimensional tissue (cells 13-38). For single cells, the ordinary differential equations for gating variables and voltage are integrated using the MATLAB (The Mathworks, Inc.) ode solver *ode15s*. Tissue simulations are solved using an operator splitting method, as described in detail in our recent work<sup>26</sup>. In brief, gating variables for each membrane patch are integrated using forward Euler or Rush-Larson methods (for Hodgkin-Huxley type variables), which are subsequently used to update membrane ionic currents. The resulting system of ordinary differential equations and algebraic expressions governed by the electrical circuit (Figure 1B) are integrated using the backward Euler method to update intracellular and cleft voltages. For both single cells and tissue, initial conditions are set to steady-state values consistent with the resting potential of -84.5 mV.

## RESULTS

### ***Channels with shifted $I_{\text{Na}}$ biophysical properties promote an earlier action potential upstroke.***

We first investigate the impact of heterogeneous  $I_{\text{Na}}$  populations in a single cell. Critically, in the single cell model, all ion channels are represented as being localized on the same membrane patch, i.e., there is no  $I_{\text{Na}}$  spatial distribution. We first consider the case of a mixed 50:50  $I_{\text{Na}}$  distribution ( $f_{\text{Na}} = 0.5$ ), equally split between baseline and shifted  $I_{\text{Na}}$  (magenta [voltage traces], red/blue [ $I_{\text{Na}}$  traces]) and compare with the nominal homogeneous model, with only baseline  $I_{\text{Na}}$  (black). At the level of the single cell AP, we find almost no difference between the cell with the mixed  $I_{\text{Na}}$  subpopulations and only baseline  $I_{\text{Na}}$ , except for small changes in the peak voltage (Figure 2A). However, closer examination reveals that the presence of the shifted  $I_{\text{Na}}$  results in an earlier AP upstroke (magenta), compared with the only baseline  $I_{\text{Na}}$  model (black). We find that the early AP upstroke is due to the subpopulation of shifted  $I_{\text{Na}}$  activating earlier (red), which in turn activates the subpopulation of baseline  $I_{\text{Na}}$  earlier (blue), compared with the only baseline  $I_{\text{Na}}$  model (black). Additionally, in the cell with both subpopulations, the peak of the shifted  $I_{\text{Na}}$  is greater than the peak of the baseline  $I_{\text{Na}}$ . That is, even though the conductances of the two



subpopulations are equal, the magnitude of the shifted  $I_{Na}$  subpopulation is larger compared with the baseline  $I_{Na}$ .

In a single cell with 70% shifted  $I_{Na}$  ( $f_{Na} = 0.7$ ), we find that the effects described above are magnified (Figure 2B). The AP upstroke is earlier, compared with the 50-50% distribution, and the shifted  $I_{Na}$  subpopulation is greatly enhanced and is almost equal in magnitude (red) to the only baseline  $I_{Na}$  (black).

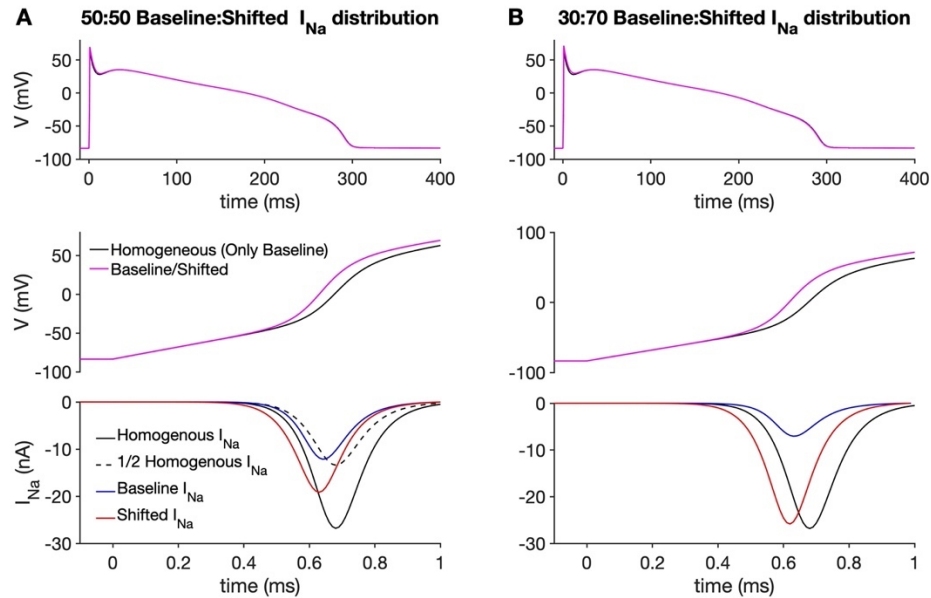

Figure 2. Addition of a subpopulation of  $I_{Na}$  with shifted biophysical properties results in earlier AP upstroke and larger  $I_{Na}$  current in a single cell. Transmembrane voltage ( $V$ ) (row 1, 2; magenta) and  $I_{Na}$  (row 3; blue/red) are shown as functions of time for a single cell with a (A) 50:50 and (B) 30:70 distribution of baseline:shifted  $I_{Na}$  subpopulations. The corresponding voltage and  $I_{Na}$  curves are shown for the homogeneous (only baseline  $I_{Na}$ ) single cell in black. In (A),  $I_{Na}$  scaled by a factor of 1/2 is shown for comparison with  $I_{Na}$  from the baseline/shifted single cell (dashed black line).

We next quantified how the  $I_{Na}$  peak and total  $Na^+$  charge ( $Q_{Na}$ ) for the two  $I_{Na}$  subpopulations varies, as the fraction of the shifted  $I_{Na}$  subpopulation changes in a single cell (Figure 3). We first measure the ratio of the shifted  $I_{Na}$  peak to the baseline  $I_{Na}$  peak as a function of  $f_{Na}$  (Figure 3A). As  $f_{Na}$  increases, the shifted  $I_{Na}$  peak ratio also increases, as expected. However, we can compare this increase with expectations based solely on the change in conductance between the two subpopulations. Based on conductance changes alone, we would expect the ratio between the two peaks to scale with  $f_{Na}/(1-f_{Na})$  (dashed line). Critically, the actual simulated ratio (black) is always greater than this expectation, meaning that the shifted  $I_{Na}$  peak is always proportionally larger than the shifted  $I_{Na}$  conductance.

We also quantified the total charge carried by the two  $I_{Na}$  subpopulations and measured the fraction of the total  $Na^+$  charge ( $Q_{Na}$ ) carried by the shifted  $I_{Na}$  subpopulation (Figure 3B). Based on conductance alone, we would expect this fraction to scale with  $f_{Na}$  (dashed line). However, we find that the shifted  $Q_{Na}$  (black) is always greater than this expectation as well. That is, the shifted  $I_{Na}$  subpopulation carries a proportion of the total  $Na^+$  charge greater than its respective conductance. Plots of the  $I_{Na}$  and  $Q_{Na}$  ratios against  $f_{Na}/(1-f_{Na})$  similarly show that the shifted  $I_{Na}$  subpopulation proportionally contributes more to the total  $Na^+$  current, compared with the baseline  $I_{Na}$ , than expected based on conductance (Figure 3C, D).

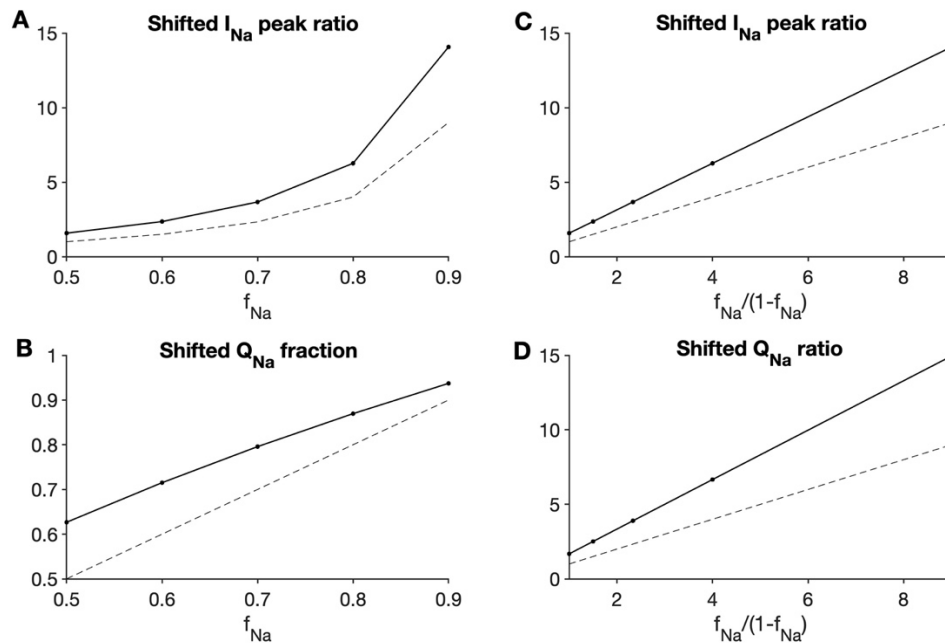

Figure 3.  $Na^+$  current with shifted biophysical properties is proportionally larger and contributes more charge than its conductance fraction in single cells. (A) The ratio of the shifted  $I_{Na}$  peak-to-baseline  $I_{Na}$  peak and (B) the fraction of charge carried by the shifted  $I_{Na}$  subpopulation  $Q_{Na}$  are shown as a function of the shifted  $I_{Na}$  conductance fraction ( $f_{Na}$ ). (C) The shifted  $I_{Na}$  ratio and (D) shifted  $Q_{Na}$  ratio are shown as a function of the shifted  $I_{Na}$ -to-baseline  $I_{Na}$  conductance fraction ratio ( $f_{Na}/[1-f_{Na}]$ ).

### ***Shifted $I_{Na}$ subpopulation enhances conduction in cardiac tissue.***

The above results demonstrate that in a single cell, channels with shifted  $I_{Na}$  biophysical properties contribute to an earlier AP upstroke. We next systematically investigate to what extent conduction in a one-dimensional tissue depends on the presence of  $Na^+$  channels with shifted  $I_{Na}$  and their localization at the ID. Further, we investigate how these properties also depend on ID structure, specifically the intercellular cleft width and the strength of gap junctional coupling.

As described in the Methods, we consider 7 distinct  $\text{Na}^+$  channel distributions, chosen to elucidate the role of both the presence of channels with shifted  $I_{\text{Na}}$  biophysical properties and their localization at the ID. In Figure 4, we plot CV as a function of the cleft width for different values of the gap junction conductance  $g_{\text{gap}}$ . As expected, for all  $\text{Na}^+$  channel distributions, CV increases with increasing  $g_{\text{gap}}$ . For the three distributions with only Lateral  $\text{Na}^+$  channels (Figure 4A-C), CV does not depend on cleft width, also as expected since these distributions do not engage ephaptic coupling. Of these three Lateral distributions, conduction is fastest in the tissue with only shifted  $I_{\text{Na}}$  (Figure 4B), slightly faster than in tissue with a 30:70 Baseline:Shifted Mixed  $I_{\text{Na}}$  distribution (Figure 4C), with the only baseline  $I_{\text{Na}}$  slowest (Figure 4A).

The presence of the shifted  $I_{\text{Na}}$  subpopulation in the Polarized distributions similarly results in faster conduction. In contrast with the Lateral distributions, the four Polarized distributions (Figure 4D-G) exhibit a clear dependence on the cleft width. Consistent with prior studies<sup>16,17,25,27,33</sup>, for all Polarized distributions, narrowing the cleft tends to slow conduction for stronger gap junctional coupling, while narrowing the cleft tends to enhance conduction for weaker gap junctional coupling. Further, we find that the tissue with Shifted/Polarized and Mixed/Polarized  $I_{\text{Na}}$  distributions exhibit greater sensitivity to the cleft width, compared with the Baseline/Polarized distribution.

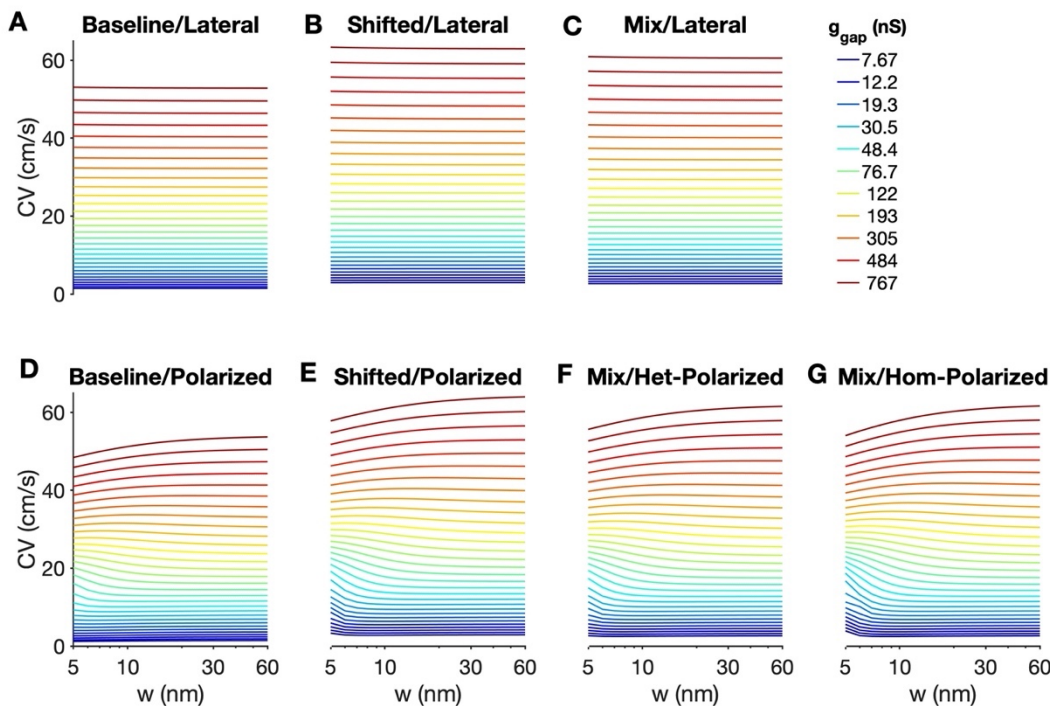

Figure 4. Conduction velocity depends on  $\text{Na}^+$  channel distribution, cleft width, and gap junctional coupling. Conduction velocity (CV) is shown as a function of cleft width ( $w$ ) for different  $\text{Na}^+$  channel distributions and gap junction conductance  $g_{\text{gap}}$ . For Polarized distributions, narrow cleft slows conduction for high  $g_{\text{gap}}$  and enhanced

conduction for low  $g_{gap}$ . The physiological distribution (Mix/Homogeneous-Polarized) exhibits the greatest sensitivity to cleft width.

In Figure 5, we plot the same CV measurements, as a function of  $g_{gap}$  for different values of cleft width  $w$ . The Lateral  $I_{Na}$  distributions similarly exhibit no dependence on cleft width (Figure 5A-C). From this presentation, it is also more clear to what extent CV varies for the four Polarized distributions, as a function of cleft width and  $g_{gap}$  (Figure 5D-G). As noted above, cleft narrowing results in conduction slowing for high  $g_{gap}$  and conduction enhancing for low  $g_{gap}$ . Importantly, we find that the Mixed/Homogeneous-Polarized distribution depends on cleft width for the widest range of  $g_{gap}$  values and demonstrates the greatest sensitivity to cleft width (for a given  $g_{gap}$ ).

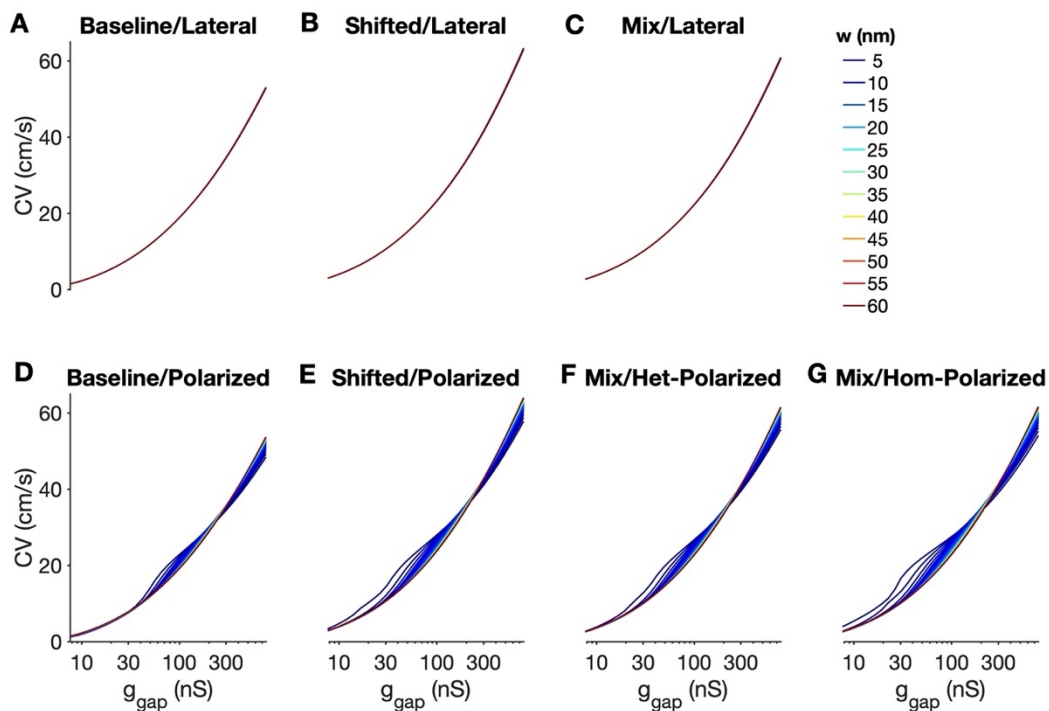

Figure 5. Conduction velocity depends on  $Na^+$  channel distribution, gap junctional coupling, and cleft width. Conduction velocity (CV) is shown as a function of gap junctional conductance  $g_{gap}$  for different  $Na^+$  channel distributions and cleft width  $w$ . CV slows for decreasing  $g_{gap}$ , with sensitivity to cleft width greater for polarized distributions with the shifted and mix  $I_{Na}$  subpopulations.

In Figure 6, we plot CV as a function of  $g_{gap}$  and directly compare a subset of the  $Na^+$  channel distributions. For all cleft widths and most  $g_{gap}$  values (except the extreme high and low  $g_{gap}$ ), conduction is fastest for the Mixed/Homogeneous-Polarized (blue), followed by the Mixed/Heterogeneous-Polarized (magenta), Mixed/Lateral (black), Baseline/Polarized (red), and Baseline/Lateral (green). We also show ratios of the CV values for several combinations of  $Na^+$  channel distributions, to identify to what extent  $Na^+$  channel composition vs. localization regulate

conduction. Comparing the Polarized vs Lateral Distribution with Baseline  $I_{Na}$ , the Polarized distribution has faster CV, i.e., ratio > 1, for a range of  $g_{gap}$  values between about 50-500 nS, but slower CV for larger or smaller  $g_{gap}$  outside this range (Figure 6B, solid black). Comparing the Polarized vs Lateral Distribution for the Mixed  $I_{Na}$  distributions, the Polarized distributions is similarly faster for a  $g_{gap}$  range and slower for outside the range (Figure 6B, dashed black). However, the  $g_{gap}$  range for enhanced CV is widened to about 20-500 nS. That is, polarizing the mixed  $I_{Na}$  subpopulation enhances conduction for a wider range of  $g_{gap}$ .

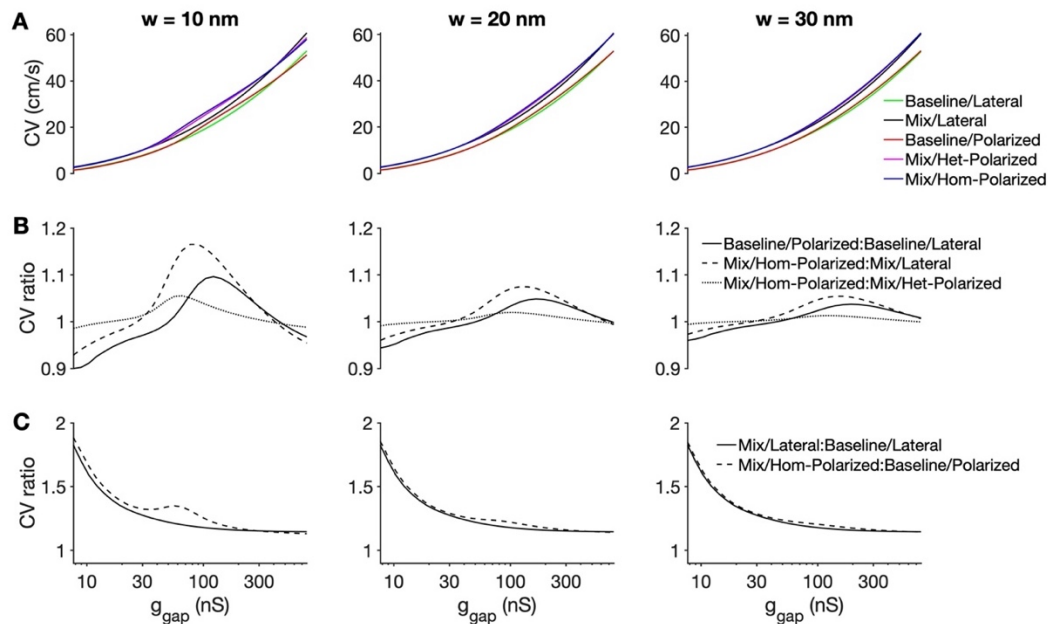

Figure 6. The physiological (Mix/Homogeneous-Polarized) distribution exhibits enhanced conduction. (A) Conduction velocity (CV) is shown as a function of gap junction conductance  $g_{gap}$  for cleft widths of 10 (left), 20 (middle), and 30 (right) nm and different  $Na^+$  channel distributions. (B, C) The ratio of CV for different  $Na^+$  channel distribution combinations are shown. Parameters:  $f_{Na} = 0.7$ .

We can also directly compare the Mixed/Homogeneous-Polarized vs Mixed/Heterogeneous-Polarized distributions, which have the same fraction of baseline vs shifted  $I_{Na}$  current and the same fraction of  $I_{Na}$  polarized at the ID, with the only difference being whether or not the  $I_{Na}$  subpopulations are spatially distinct. We find that for nearly all  $g_{gap}$  values, this CV ratio > 1, i.e., polarization specifically of the shifted  $I_{Na}$  subpopulation enhances conduction (Figure 6B, dotted line). Comparing the Mixed/Lateral vs Baseline/Lateral distribution, we find that the CV ratio > 1 for all  $g_{gap}$  values, and the ratio is increases as  $g_{gap}$  is decreased (Figure 6C, solid line). That is, with only Lateral  $Na^+$  channels, the Mixed  $I_{Na}$  subpopulations always enhances conduction, relative to Baseline  $I_{Na}$ , and to a greater extent for weak gap junctional coupling. Interestingly, when we make the comparable comparison in Polarized tissue (Mixed/Homogeneous-Polarized vs. Baseline/Polarized), we observe the same general trend, with the addition of an additive

“bump” between  $g_{\text{gap}}$  of 30 and 200 nS (Figure 6C, dashed line). Across all distributions and  $g_{\text{gap}}$ , the magnitude of these effects generally decreases as cleft width  $w$  increases.

Collectively, these results support the following general conclusions: (i) the inclusion of a subpopulation with shifted  $I_{\text{Na}}$  biophysical properties speeds up conduction, with CV enhancement increasing as gap junctional coupling weakens; (ii) polarization of any  $\text{Na}^+$  channels enhances conduction over a wide range of gap junctional coupling levels; (iii) polarization of the shifted  $I_{\text{Na}}$  subpopulation results in an additional conduction enhancement (over a wider  $g_{\text{gap}}$  range); and (iv) the influence of  $\text{Na}^+$  channel polarization on conduction depends on the cleft width, while the role of shifted  $I_{\text{Na}}$  subpopulation predominantly does not depend on cleft width (except in the 30-100 nS  $g_{\text{gap}}$  range).

In Supporting Figures S1 and S2, we plot these same CV ratios for different combinations of  $\text{Na}^+$  channel distributions for different values of  $f_{\text{Na}}$ . For nearly all cases, the magnitude of the relationships described above are larger as  $f_{\text{Na}}$  is increased. That is, the influence of the shifted  $I_{\text{Na}}$  subpopulation and the polarization of specific  $\text{Na}^+$  channel subpopulations is magnified as the subpopulation fraction is increased.

In Figure 7, we show contour maps of CV for the Baseline/Polarized, Mix/Homogeneous-Polarized, and Shifted/Polarized distributions as functions of cleft width and  $f_{\text{Na}}$  for different values of gap junction conductance  $g_{\text{gap}}$ . Importantly, these maps illustrate the range of CV changes due solely to tissue structural changes (i.e., cleft width variation) and  $\text{Na}^+$  channel subpopulation redistribution (i.e., varying  $f_{\text{Na}}$ ) for a fixed degree of gap junctional coupling. Several key points are apparent from these plots: For all conditions, CV is larger for the Mix/Homogeneous-Polarized distribution, relative to Baseline/Polarized, but slower than the Shifted/Polarized distribution. Further, CV depends on both cleft width and  $f_{\text{Na}}$ ; however, this relationship depends on gap junctional coupling. For low  $g_{\text{gap}}$ , CV predominantly depends on cleft width, while for high  $g_{\text{gap}}$ , CV predominantly depends on  $f_{\text{Na}}$ , with moderate  $g_{\text{gap}}$  exhibiting comparable dependence on both. Thus, for weak gap junctional coupling, CV is most effectively modulated by changes in cleft width, while for strong gap junctional coupling, CV is most effectively modulated by  $\text{Na}^+$  channel redistribution. Additionally, the number of contour regions (with 1-cm/s spacing) illustrates that CV for the Mix/Homogeneous-Polarized distribution exhibits the greatest variability, compared with either the Baseline/Polarized or Shifted/Polarized distributions. That is, the physiological distribution, through cleft width changes and  $\text{Na}^+$  channel redistribution, can result in a wider range of CV values, for fixed gap junctional coupling. Further, this variability in CV is wider for moderate  $g_{\text{gap}}$ , i.e., CV can be modulated to the greatest degree for moderate levels of gap junctional coupling.



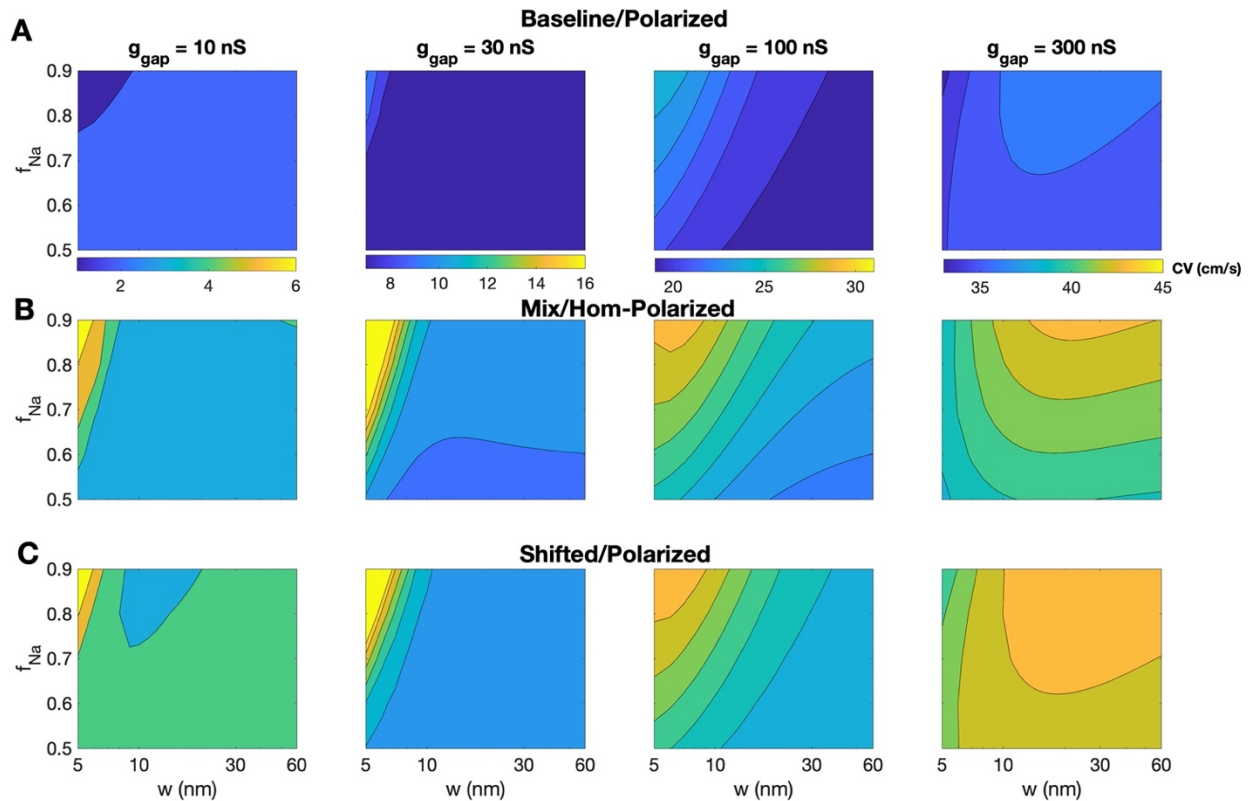

Figure 7. The physiological (Mix/Homogeneous-Polarized) distribution exhibits sensitivity to cleft widths and  $Na^+$  channel redistribution. Contour maps of the conduction velocity (CV) are shown for the (A) Baseline/Polarized, (B) Mix/Homogeneous-Polarized, and (C) Shifted/Polarized distributions as functions of cleft width  $w$  and  $f_{Na}$ , with 1-cm/s spacing.

***Shifted  $I_{Na}$  subpopulation promote larger faster cell-cell transmission and post-junctional  $I_{Na}$ .***

We next sought to understand the mechanisms underlying the changes in conduction due to  $Na^+$  channel biophysical properties and distribution. In Figure 8A (top), we plot the activation time for the Baseline/Polarized (black) and Mix/Homogeneous-Polarized (magenta) distributions as a function of the cell number, for which the time of post-junctional, lateral, and pre-junctional membrane activation is denoted for each cell. Both simulations have moderate gap junctional coupling ( $g_{gap} = 100$  nS) and  $I_{Na}$  polarization ( $f_{Na} = 0.7$ ). Consistent with the faster CV measurements above, activation time is earlier for the Mix/Homogeneous-Polarized distribution. For direct comparison, we also shifted the curves, such that the two align at the activation time of either the pre-junctional membrane of cell 24 (Figure 7A, middle) or post-junctional membrane of cell 25 (bottom). From these two plots, we can identify that the primary difference in activation time is due to the delay in time between the cell 24 pre-junctional membrane and the cell 25 post-junctional membrane, i.e., the time for the electrical wave to propagate across the cell-cell junction. In contrast, the delay between the post-junctional and pre-junctional membrane of cell 25 is near identical for the two distributions, i.e., there is no difference in the time for the electrical wave to propagate across the intracellular space.



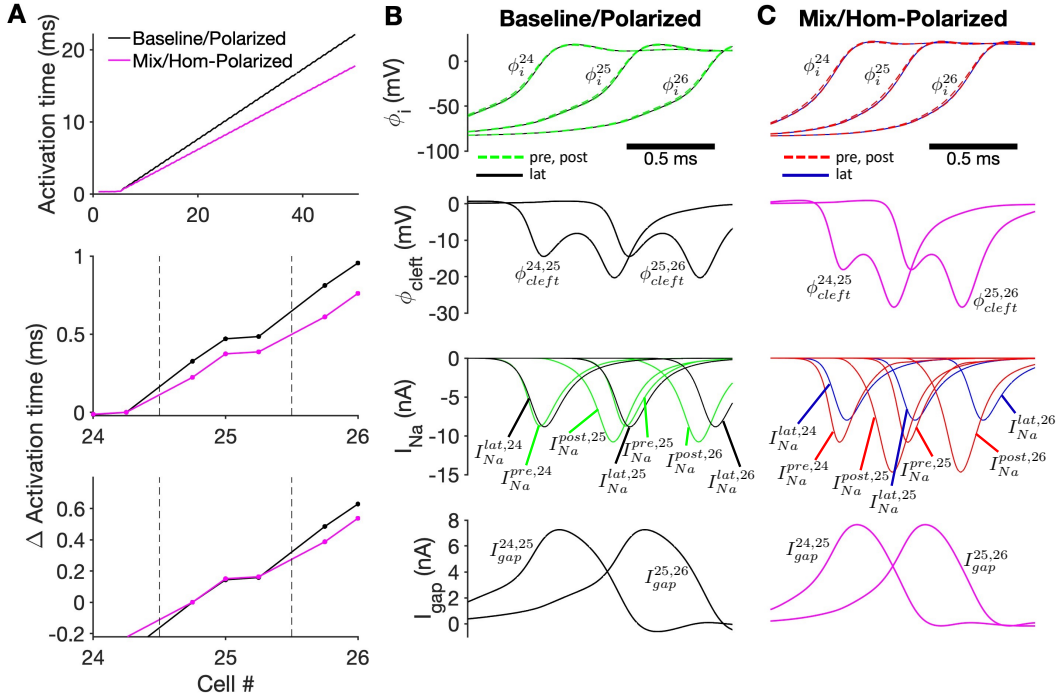

Figure 8. Enhanced post-junctional  $I_{Na}$  with shifted biophysical properties promotes faster cell-cell transmission and conduction. (A) (top) Activation time for post-junctional, lateral, and pre-junctional membranes for each cell for the Baseline/Polarized (black) and Mix/Homogeneous-Polarized (magenta) distributions. The change in activation time is shown, adjusted to (middle) cell 24 pre-junctional membrane and (bottom) cell 25 post-junctional membrane activation times. (B, C) Intracellular potential  $\phi_i$  (row 1); cleft potential  $\phi_{cleft}$  (row 2); pre- and post-junctional  $I_{Na}$  (B, green; C, red) and lateral  $I_{Na}$  (B, black; C, blue) (row 3); and gap junction current (row 4) are shown as functions of time for (B) Baseline/Polarized and (C) Mix/Homogeneous-Polarized distributions. Parameters:  $g_{gap} = 100$  nS,  $f_{Na} = 0.7$ ,  $w = 10$  nm.

We next investigate the voltage and  $I_{Na}$  changes associated with these two cases (Figure 8B, C). We observe a slower AP upstroke in the Baseline/Polarized distribution, compared with the Mix/Homogeneous-Polarized distribution (Figure 8B, C, row 1), consistent with the single cell simulations in Figure 2. In both distributions, the cleft space between the cells is hyperpolarized, consistent with prior studies of ephaptic coupling mechanisms<sup>16,25,26,40,42</sup> (Figure 8B, C, row 2). However, we find a larger magnitude hyperpolarization in the Mix/Homogeneous-Polarized distributions (magenta). Further, while there are small differences in time course and magnitude, the gap junctional current is comparable in both distributions, highlighting that the differences in conduction velocity are directly attributable to the differences in  $Na^+$  channel distribution.

However, examination of the  $I_{Na}$  reveals critical differences between the two distributions, specifically considering the cell 24 lateral and pre-junctional  $I_{Na}$ ; cell 25 post-junctional, lateral, and pre-junctional  $I_{Na}$ ; and cell 26 post-junctional and lateral  $I_{Na}$ . For the Baseline/Polarized

distribution, for a given cell (here, cell 25) we find that the post-junctional  $I_{Na}$  (green) activates earliest, as expected. However, the lateral (black) and pre-junctional (green)  $I_{Na}$  activate at almost the same time, with the pre-junctional  $I_{Na}$  peak slightly earlier. Additionally, the post-junctional peak  $I_{Na}$  is largest in magnitude, while the lateral and pre-junctional peak  $I_{Na}$  are almost identical magnitude. For the Mix/Homogeneous-Polarized distribution, again for a given cell (considering cell 25), the post-junctional  $I_{Na}$  (red) similarly activates earliest and has the largest peak. However, the pre-junctional  $I_{Na}$  (red) activates next and has the second largest peak, while the lateral  $I_{Na}$  (blue) activates last and has the smallest peak. That is, due to the shifted  $I_{Na}$  biophysical properties of the junctional  $I_{Na}$  current, the pre-junctional  $I_{Na}$  activates before the lateral membrane, despite being further ‘downstream’ in the cell. In Supporting Figure S3, we quantify the delay between the timing of the  $I_{Na}$  peak for the post-junctional, lateral, and pre-junctional  $I_{Na}$  for cell 25 and the AP activation of the cell 24 post-junctional membrane, for different values of  $f_{Na}$  and cleft width. We find that the post-junctional  $I_{Na}$  peak is consistently earliest and increasingly so for larger  $f_{Na}$  and smaller cleft width. For nearly all cases and both distributions, the pre-junctional  $I_{Na}$  peak is earlier than the lateral membrane. However, the difference in peak timing is greatest for the Mix/Homogeneous-Polarized distribution, compared with the Baseline/Polarized distribution, and for larger  $f_{Na}$  and smaller cleft width.

For the value of  $f_{Na} = 0.7$  (Figure 8), the total  $I_{Na}$  conductance distribution is thus 35%, 30%, and 35% for the post-junctional, lateral, and pre-junctional membranes, respectively. However, for both  $Na^+$  channel distributions considered in Figure 8, the post-junctional  $I_{Na}$  is disproportionately larger, compared to this expectation based on conductance. Further, for the Mix/Homogeneous-Polarized distribution, the lateral  $I_{Na}$  is disproportionately smaller. That is, the pre-junctional  $I_{Na}$  contributes more to the total  $I_{Na}$ , while the lateral  $I_{Na}$  contributes less, than simply the expected proportion based on the conductance distribution.

We quantify these trends by plotting the fraction of total charge carried by  $I_{Na}$  on each membrane ( $Q_{Na}$ ) as a function of  $f_{Na}$  and for different cleft widths (Figure 9). Based on conductance distribution, the post- and pre-junctional membranes would be expected to scale with  $f_{Na}/2$ , while the lateral membrane would be expected to scale with  $1-f_{Na}$ , shown as dashed black lines. As expected, both post- and pre-junctional  $Q_{Na}$  increase with  $f_{Na}$ , while lateral  $Q_{Na}$  decreases with  $f_{Na}$ . We find that for both distributions, post-junctional  $Q_{Na}$  is larger than expectation based on the conductance distribution (Figure 9A), with  $Q_{Na}$  for the Mix/Homogeneous-Polarized distribution consistently larger than the Baseline/Polarized distribution. Both of these trends are greatest for narrow cleft width.

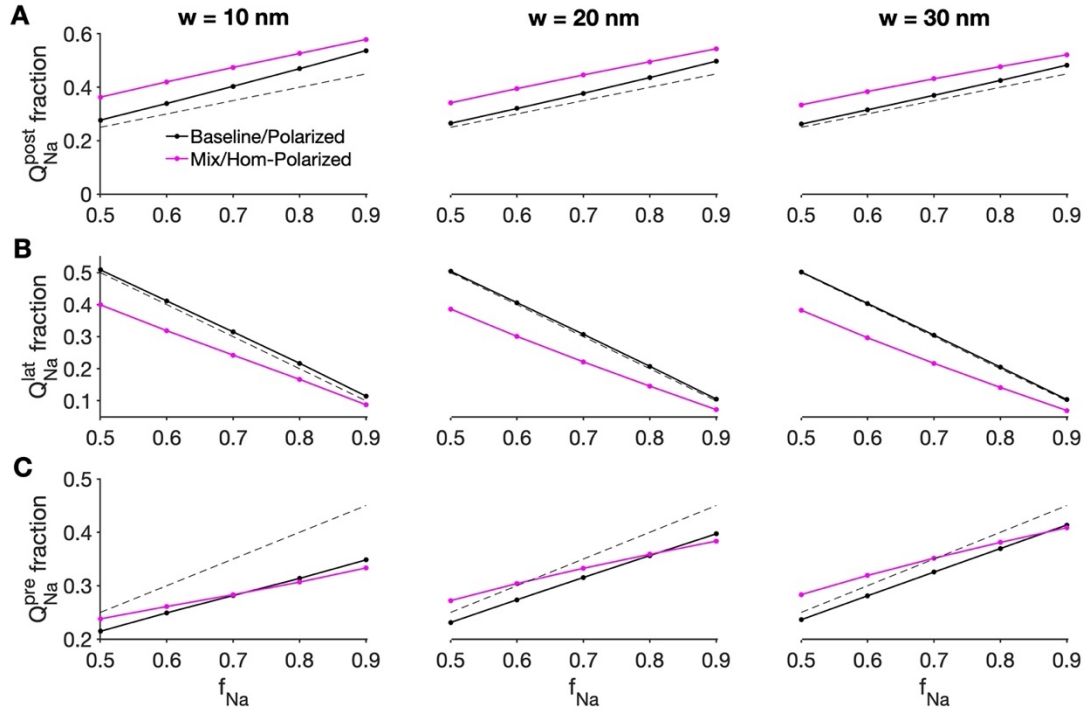

Figure 9. Post-junctional  $I_{Na}$  contributes proportionally more charge than the conductance fraction. The fraction of  $Na^+$  charge  $Q_{Na}$  carried by (A) post-junctional, (B) lateral, and (C) pre-junctional  $I_{Na}$  is shown as a function of  $f_{Na}$ , for cleft widths of 10 (left), 20 (middle), and 30 (right) nm and different  $Na^+$  channel distributions (Baseline/Polarized, black; Mix/Homogeneous-Polarized, magenta). The dashed black line corresponds with the conductance fraction on each membrane ( $f_{Na}/2$  on post- and pre-junctional;  $1-f_{Na}$  on lateral membrane). Parameters:  $g_{gap} = 100$  nS.

Interestingly, the lateral  $Q_{Na}$  for the Baseline/Polarized distribution is nearly identical to the conductance expectation (dashed line), i.e., the lateral  $I_{Na}$  charge is proportional to its conductance (Figure 8B). In contrast, lateral  $Q_{Na}$  for the Mix/Homogeneous-Polarized distribution is less than the conductance distribution. Due the opposing trends for the post-junctional and lateral  $Q_{Na}$ , the pre-junctional  $Q_{Na}$  fraction trends are inconsistent. For smaller  $f_{Na}$ , the Mix/Homogeneous-Polarized distribution pre-junctional  $Q_{Na}$  fraction is larger than the Baseline/Polarized distribution, and to a greater extent for wider cleft width.

Thus, in summary, for both distributions, the post-junctional  $I_{Na}$  is consistently contributing the largest fraction of the total  $I_{Na}$  charge, with a greater contribution for the Mix/Homogeneous-Polarized distribution. As a consequence, the lateral membrane  $I_{Na}$  contribute proportionally contribute less to the total  $I_{Na}$ , more so for tissues with the Mixed subpopulation.

In Figure 10, we plot the  $Q_{Na}$  fractions as functions of  $g_{gap}$  for different values of  $f_{Na}$  and cleft width for the Mix/Homogeneous-Polarized distribution. For all cleft width and  $g_{gap}$ , post- and pre-junctional  $Q_{Na}$  increase with increasing  $f_{Na}$ , while lateral  $Q_{Na}$  decreases, as expected. However,

$Q_{Na}$  fractions exhibit an interesting dependence on  $g_{gap}$ . For all cases, the lateral  $Q_{Na}$  decreases as  $g_{gap}$  decreases (Figure 10B). However, post-junctional  $Q_{Na}$  exhibits a biphasic dependence on  $g_{gap}$ , with a positive ‘bump’ between around 30 and 300 nS (Figure 10A), while pre-junctional  $Q_{Na}$  exhibits a similar negative ‘bump’ in the same  $g_{gap}$  range (Figure 10C). Thus, collectively these results demonstrate that as gap junctional coupling weakens, lateral  $Q_{Na}$  decreases, such that the two junctional membranes constitute a larger  $Q_{Na}$  contribution. Further, the post-junctional  $Q_{Na}$  is always larger than the pre-junctional  $Q_{Na}$ . However, this disparity is greatest for  $g_{gap}$  values around 30-300 nS, with pre-junctional  $Q_{Na}$  disproportionately largest, while for extreme cases of either high or low gap junctional coupling, post- and pre-junctional  $Q_{Na}$  are much similar in magnitude. The magnitude of these trends is generally smaller for wider cleft width. In Supporting Figure S4, we observed similar trends for the Baseline/Polarized distribution, with the lateral  $Q_{Na}$  generally contributing a larger proportion, consistent with the result in Figure 10.

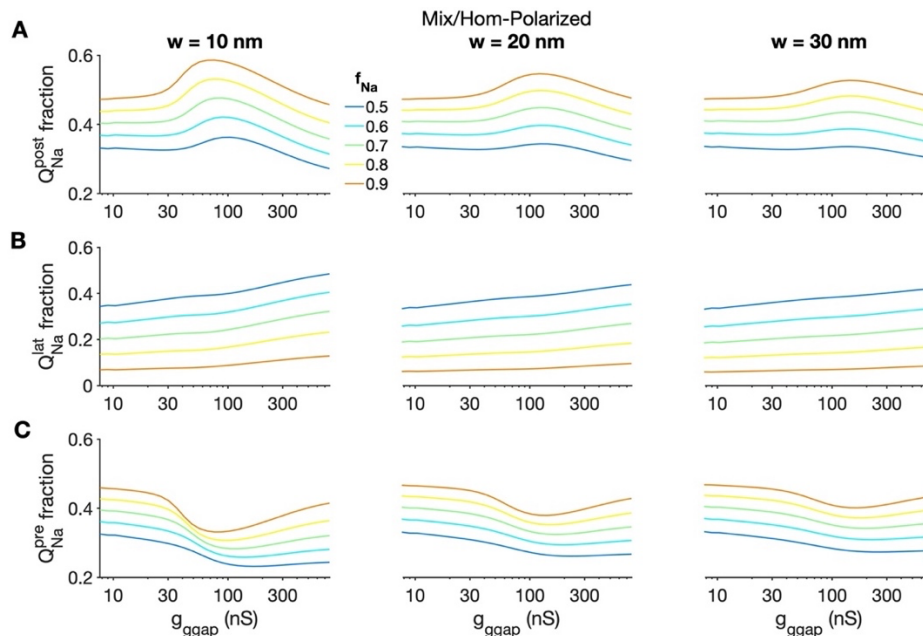

Figure 10. Post-junctional  $I_{Na}$  contribution is enhanced for moderate gap junction coupling. The fraction of  $Na^+$  charge  $Q_{Na}$  carried by (A) post-junctional, (B) lateral, and (C) pre-junctional  $I_{Na}$  is shown as a function of gap junction conductance  $g_{gap}$  for cleft widths of 10 (left), 20 (middle), and 30 (right) nm and different values of  $f_{Na}$  for the Mix/Homogeneous-Polarized distribution.

To further demonstrate the functional role of the ID-localized  $I_{Na}$ , we measure CV for membrane-specific block in the Mix/Homogeneous-Polarized distribution for  $f_{Na} = 0.7$  (Figure 11). Specifically, we reduce the  $I_{Na}$  conductance on either the ID (red) or lateral (blue) membranes, while maintaining the same conductance on the other membrane. We consider the full range from the nominal Mix/Homogeneous-Polarized distribution with 70% ID-localized shifted  $Na^+$  channels and 30% lateral membrane-localized baseline  $Na^+$  channels and decrease one of these

subpopulations individually until only the other subpopulation is present. We note that this results in a decrease in overall cell  $I_{Na}$  conductance. We find that reducing the conductance of either the ID- or lateral membrane-localized  $I_{Na}$  slows conduction. However, across all conditions (cleft width and gap junction conductance), we find that reducing ID-localized  $I_{Na}$  results in greater conduction slowing, with generally a greater disparity for larger  $g_{gap}$ . In Supporting Figure S5, we find the same trends for  $f_{Na} = 0.5$ .

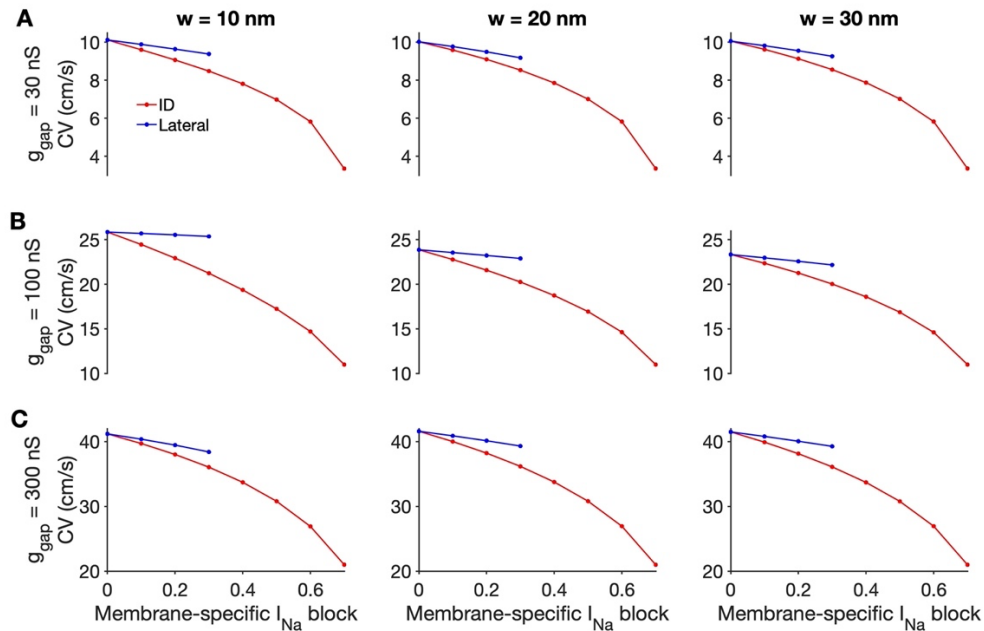

Figure 11. Membrane-specific  $I_{Na}$  block in the Mix/Homogeneous-Polarized distribution. (A-C) Conduction velocity (CV) is shown as a function of the  $I_{Na}$  conductance block of the ID (red) or lateral (blue) membrane, for different values of cleft width  $w$  and gap junction conductance  $g_{gap}$ . Parameters:  $f_{Na} = 0.7$ .

All of the previous simulations considered conduction from rest. We next consider how different  $Na^+$  channel distributions impact conduction for faster pacing rates, i.e., shorter basic cycle length (BCLs). For the Baseline/Polarized and Mix/Homogeneous-Polarized distributions, we paced the tissues at different BCL values until steady-state or a steady-state alternating pattern was reached and measured CV for different cleft widths and  $g_{gap}$  (Figure 12). Consistent with the above results, across all BCLs, conduction is faster for the Mix/Homogeneous-Polarized distribution (magenta), compared with the Baseline/Polarized distribution (black). Additionally, for all cleft widths and  $g_{gap}$ , tissue with the Mix/Homogeneous-Polarized distribution could be paced at shorter BCLs, before loss of 1:1 capture or conduction block. Additionally, for faster pacing rates, the tissues exhibited spatially concordant alternans, in which action potential duration alternates on a beat-to-beat basis. This alternation occurs concurrently with a beat-to-beat alternation in CV, such that the CV vs. BCL bifurcates at this alternans onset cycle length. We find that alternans onset is consistently at a shorter BCL for the Mix/Homogeneous-Polarized

distribution, i.e., faster pacing is required to induce alternans. In Supporting Figure S5, we plot CV against the preceding diastolic interval (DI) (i.e., the CV restitution curve) for these conditions. We find that the CV restitution curve extends to shorter DI values for the Mix/Homogeneous-Polarized distribution, and in most cases, the curve is flatter, i.e., CV is less sensitive to changes in DI.

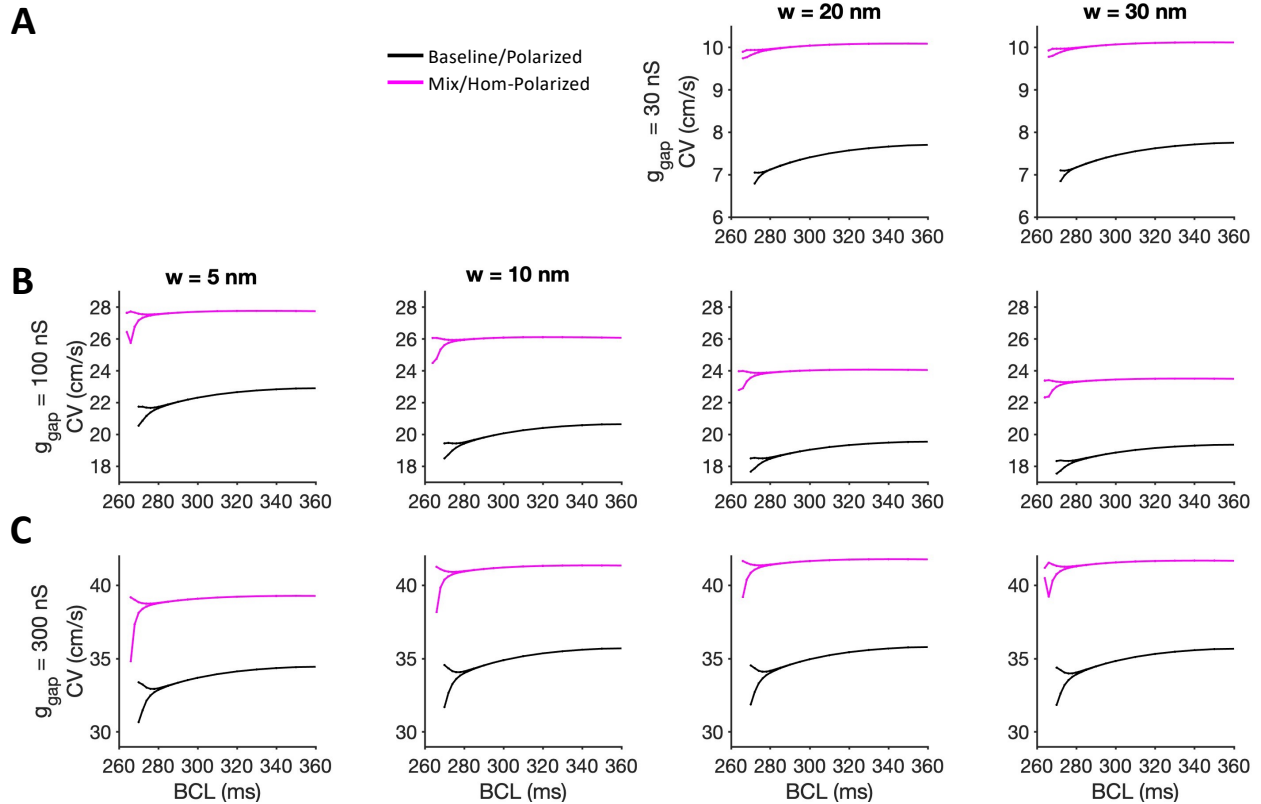

Figure 12. The Mix/Homogeneous-Polarized distribution exhibits faster conduction, compared with the Baseline/Polarized distribution, for all basic cycle lengths (BCLs). Conduction velocity (CV) is shown as a function of BCL for different values of cleft widths ( $w$ ) and gap junction conductance  $g_{\text{gap}}$ . Note, for the cases in the upper left panels (low  $g_{\text{gap}}$ , narrow cleft width), conduction failed to capture at shorter BCL values.

Finally, we consider to what extent conduction differences due to the Mixed distribution depend on the shift in either the SSA or SSI curves. Thus, we consider cases in which the shifted  $I_{\text{Na}}$  subpopulation have only either a shift in the SSA or SSI relationships. In Figure 13A, we plot CV as function of  $g_{\text{gap}}$  for these two cases, with the Baseline/Polarized and Mix/Homogeneous-Polarized (with both SSA- and SSI-shifts) distributions shown for comparison. CV increases for increasing  $g_{\text{gap}}$ , as in previous results. Importantly, for all  $g_{\text{gap}}$  and cleft widths, we find that the Mix/Homogeneous-Polarized distribution (magenta), with both SSA and SSI shifts, exhibits the largest CV, while the Baseline/Polarized distribution (black) exhibits the slowest CV. The

Mix/Homogeneous-Polarized distribution, with only the SSA shift, has the next fastest CV, while the case with only the SSI shift is third.

Relative to the Mix/Homogeneous-Polarized distribution, the CV ratio for tissue with only SSA-shifted  $I_{Na}$  is above 0.9, nearly independent of  $g_{gap}$  or cleft width (Figure 13B). In contrast, the CV ratio for the tissue with only SSI-shifted  $I_{Na}$  is consistently lower, varying between 0.6 and 0.9, generally decreasing as  $g_{gap}$  decreases. The CV ratio for the Baseline/Polarized distribution is the smallest and always less than 1 (Note: this curve is the inverse of the dashed line in Figure 6C). Thus, we find that, while both SSA and SSI shifts result in enhancement in conduction (relative to the Baseline/Polarized case), the shift in the SSA curve is primarily responsible for the increase in conduction observed in the Mix/Homogeneous-Polarized distribution.

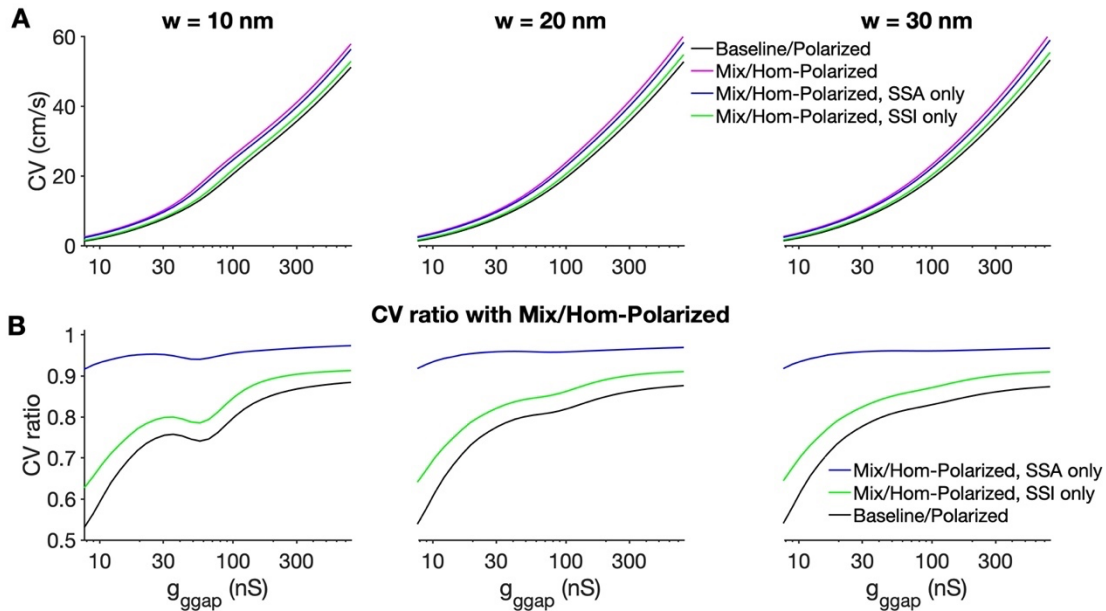

Figure 13. The shift in steady-state activation (SSA) predominantly reproduces the conduction changes in the shifted  $I_{Na}$  subpopulation. (A) Conduction velocity (CV) is shown as a function of gap junction conductance  $g_{gap}$  and cleft widths of 10 (right), 20 (middle), and 30 (right) nm, for the Baseline/Polarized (black) and Mix/Homogeneous-Polarized (both shifts, magenta; only SSA, blue; only SSI, green) distributions. (B) The ratio of CV values for different distributions, with the Mix/Homogeneous-Polarized distributions, are shown.

## DISCUSSION

### Summary of main findings.

In this study, we demonstrate that a subpopulation with distinct biophysical properties, specifically shifted SSI and SSA voltage-dependence, can modulate cardiac conduction. In a single cell, this subpopulation promotes an early AP upstroke, in a manner such that the shifted  $Na^+$  channels provide a proportionally greater contribution to the total  $Na^+$  charge during the upstroke. In a one-dimensional tissue model that accounts for the subcellular spatial localization



of the different subpopulations, the shifted Na<sup>+</sup> channels promote faster conduction. Further, the shifted Na<sup>+</sup> channels result in greater CV sensitivity to changes in the intercellular cleft width, and this occurs across the entire range of physiological values for the gap junction conductance. The ID-localized shifted Na<sup>+</sup> channels also provide a proportionally greater contribution to the total Na<sup>+</sup> charge, in particular the post-junctional Na<sup>+</sup> channels, while lateral membrane-localized Na<sup>+</sup> channels contribute proportionally less, such that loss of the ID-localized Na<sup>+</sup> channels result in greater conduction slowing. Additionally, we find that the ID-localized shifted Na<sup>+</sup> channels enable conduction for faster pacing rates, in a manner that results in a flatter CV restitution curve. Finally, we demonstrate that the shift in the SSA curve is primarily responsible for the enhancement in conduction.

### **Physiological sources and consequences of two Na<sup>+</sup> channel subpopulations.**

We highlight that our computational study is agnostic as to the specific “source” for the different biophysical properties between the Na<sup>+</sup> channel subpopulations, which could arise due to differences in interacting and scaffolding proteins at the distinct subcellular locations<sup>1,2,8,56</sup>. We speculate that association with different  $\beta$  subunits, which have been shown to alter Nav1.5 biophysical properties<sup>5,6</sup>, in different subcellular locations could also contribute to distinct Na<sup>+</sup> subpopulations. Finally, there is increasing evidence for the presence of different Nav1.x isoforms in cardiac myocytes,<sup>57,58</sup> which could also result in subpopulations with distinct biophysical properties. Our computational study provides a framework for investigating the potential impact of different Na<sup>+</sup> channel subpopulations. Here, we specifically considered two subpopulations, with “baseline” and “shifted” biophysical properties based on measures from Lin et al<sup>11</sup>; we highlight that the specific subpopulation biophysical properties were based on one specific set of conditions. However, these properties can and likely do vary for different conditions and disease settings.

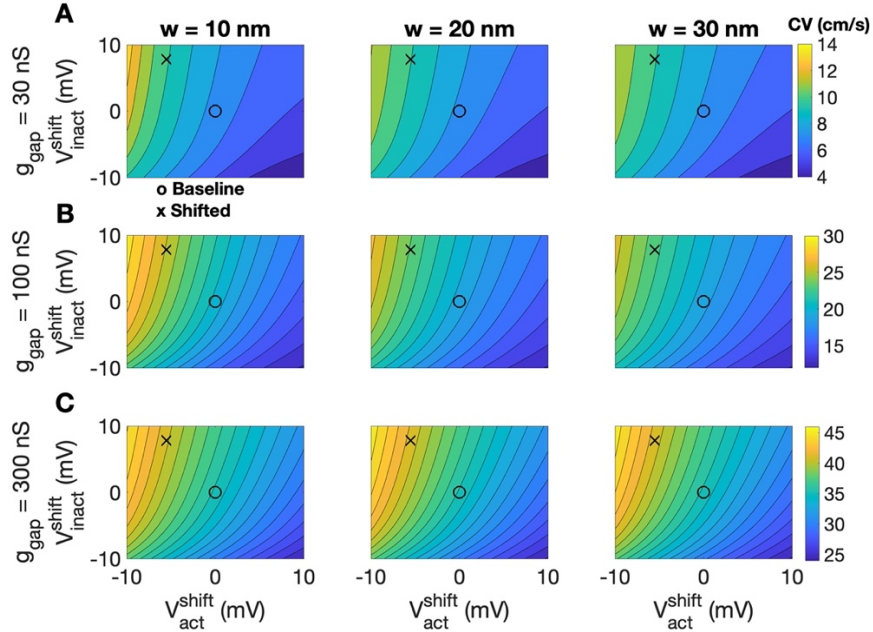

Figure 14. Negative shifts in steady-state activation and positive shifts in steady-state inactivation enhance conduction. Contour maps of the conduction velocity (CV) are shown as functions of  $V_{\text{act}}^{\text{shift}}$  and  $V_{\text{inact}}^{\text{shift}}$ , for different values of cleft widths ( $w$ ) and gap junction conductance  $g_{\text{gap}}$ , with 1-cm/s spacing. Parameters: Mix/Homogeneous-Polarized distribution,  $f_{\text{Na}} = 0.7$ .

As a final investigation illustrating how different biophysical properties impact conduction, we measure CV for different values of  $V_{\text{act}}^{\text{shift}}$  and  $V_{\text{inact}}^{\text{shift}}$  for the ID-localized  $\text{Na}^+$  channels in the Mix/Homogeneous-Polarized distribution (Figure 14). Across all cleft widths and gap junction conductances, a negative (left) shift in SSA and positive (right) shift in SSI both promote faster conduction, with shifts in SSA modulating CV with greater sensitivity. Thus, the directional shifts in both SSA and SSI curves in the physiological  $\text{Na}^+$  channel distribution both contribute to faster conduction. Further, we note that the large CV ranges observed due to shifts in the SSA and SSI curves are on the order of 10 mV. Thus, our study illustrates that biophysical properties differences can have important functional consequences for cardiac conduction and the contributions of the different subpopulation. Further, our approach could be naturally extended to consider multiple subpopulations with both distinct and mixed spatial localization, with biophysical properties based on interacting proteins,  $\beta$  subunits, and Nav isoforms. Future work will consider such complexities, in collaboration with experimental groups performing microscopy, patch clamp, and biophysical measurements.

We note that our computational study tests several predictions posed in the study from Lin and colleagues<sup>11</sup>. In their Discussion, the authors posit that  $\text{Na}^+$  channels in the middle of the cell “are mostly inactivated at a normal resting potential, leaving most of the burden of excitation to ...[ $\text{Na}^+$ ] channels in the ID region.” Consideration of the Mix/Homogeneous-Polarized

physiological  $\text{Na}^+$  distribution, our results mostly agree with this prediction (Figures 8-9). In particular, our results do predict that ID-localized  $\text{Na}^+$  channels provide the majority of the burden of excitation (quantified by the fraction of total  $\text{Na}^+$  charge), in particular the pre-junctional ID  $\text{Na}^+$  channels. However, we predict that the lateral membrane-localized  $\text{Na}^+$  channels also contribute, albeit less than their respective proportion of the total  $\text{Na}^+$  conductance. Further, Lin and colleagues state that “[Middle  $\text{Na}^+$ ] channels have a minimum contribution to  $I_{\text{Na}}$  under control conditions but represent a functional reserve that can be upregulated by exogenous factors.” Our simulations also generally agree with these predictions. Interestingly, the lateral membrane-localized  $\text{Na}^+$  channels contribute the least to excitation as gap junctional coupling is reduced, while pre-junctional  $\text{Na}^+$  channels contribute the most for moderate values of gap junctional conductance (Figure 10). While our study does not specifically test the hypothesis that lateral membrane  $\text{Na}^+$  channels are upregulated by exogenous factors under some conditions, our study does provide support for the notion of these channels serving as a functional reserve. That is, as  $f_{\text{Na}}$  decreases, the channels will provide a greater contribution to the burden of excitation. Additionally, while our study predicts that the loss of junctional  $\text{Na}^+$  channels results in greater conduction slowing, the loss of the lateral membrane-localized  $\text{Na}^+$  channels also slows conduction (Figures 11, S5), consistent with prior experimental studies<sup>59</sup>.

One interesting observation from the simulations across all 7 considered  $\text{Na}^+$  channel distributions is that the physiological distribution (i.e., the Mix/Homogeneous-Polarized), in general, did not support the fastest conduction (Figure 4); rather, the Shifted/Polarized distribution generally had the largest CV across different cleft widths and gap junction conductances. That is, the fastest conduction occurred for tissues with *only* the shifted  $\text{Na}^+$  channels, which naturally suggests the question of why the physiological distribution may be beneficial, compared with this Shifted/Polarized distribution of only shifted  $\text{Na}^+$  channels. First, our data demonstrates that the Mix/Homogeneous-Polarized distribution exhibits the greatest sensitivity in response to changes in cleft width (Figure 7). Thus, if we analogize conduction as being regulated by a series of “dials,” then gap junctional conductance is the “strongest” dial, highlighted by the wide range of CV values over the physiological range for  $g_{\text{gap}}$ . While in this study, overall  $\text{Na}^+$  channel conductance is fixed, prior work has also shown strong sensitivity to this value,<sup>25</sup> suggesting overall  $\text{Na}^+$  channel conductance is additional key “dial” modulating conduction. Our current study suggests that additional “dials” include the cleft width and  $\text{Na}^+$  channel biophysical properties and subcellular localization.

Additionally, we speculate that restricting  $\text{Na}^+$  channels with shifted biophysical properties to the ID and not the lateral membrane or t-tubules could potentially play an anti-arrhythmogenic protective role via several mechanisms. In the setting of dysfunctional calcium ( $\text{Ca}^{2+}$ ) handling, prior work has shown that spontaneous calcium release events can promote an influx of

depolarizing current via the  $\text{Na}^+/\text{Ca}^{2+}$  exchanger (NCX), which in turn can promote pro-arrhythmic delayed afterdepolarizations (DADs)<sup>60–62</sup>. Colocalization of shifted  $\text{Na}^+$  channels (specifically with left-shifted SSA) with the  $\text{Ca}^{2+}$  handling proteins in t-tubules would be more likely to activate due to the NCX current and thus drive DADs, such that restricting these shifted  $\text{Na}^+$  channels to the ID would be anti-arrhythmogenic. In contrast, due to inter-cellular cleft hyperpolarization described above, the subpopulation of shifted  $\text{Na}^+$  channels at the ID will, by design, activate earlier (Figures 8, S3) and is thus ideal for supporting robust conduction in concert with ephaptic mechanisms. Additionally, at faster pacing rates (and thus short DIs), prior studies have shown that steeper CV restitution curve promotes spatially discordant alternans, which can lead to conduction block and wavebreaks to initiate spiral waves and arrhythmias<sup>63–65</sup>, suggesting that the flatter CV restitution curve of the physiological distribution is also anti-arrhythmic (Figures 12, S6).

### **Limitations, Future Directions, and Conclusions.**

We note potential limitations of our study. Our tissue simulations represent a one-dimensional “fiber” or chain of coupled cells that does not account for the complex and heterogeneous three-dimensional geometry of the heart. This limits our ability to make predictions on the potential impact of  $\text{Na}^+$  channel subpopulations on transverse conduction or inherently higher dimensional electrical dynamics, such as spiral waves and arrhythmia initiation. Additionally, while we vary the distribution of  $\text{Na}^+$  channels and their respective biophysical properties, we do not consider the role of other ionic currents. While most other ionic currents will have minimal impact on conduction, the relative expression of the inward rectifier  $I_{K1}$  current has been shown to impact excitability via regulation of the resting membrane potential.<sup>66</sup>

Further, we assume that the biophysical properties and localization of the subpopulations are static; however, we speculate that these characteristics may be dynamic. Indeed, our study demonstrates that variability in these properties provide additional mechanisms for regulating conduction. Thus, our study can be considered a “snapshot” of conduction for a given  $\text{Na}^+$  channel distribution. We also do not consider additional degrees of heterogeneity, both within the tissue and within the ID. While to our knowledge, there are no measures of the spatial heterogeneity in  $\text{Na}^+$  channel distributions, it is highly plausible that such heterogeneity exists within the ventricles, and we hypothesize that conduction is robust to some degree of spatial heterogeneity in these properties. This question is a focus of future work. Additionally, there is significant spatial heterogeneity within the ID, specifically within plicate and interplicate regions, in membrane structure and intermembrane separation. We have recently developed a finite-element framework to model ID structure and integrate the resulting heterogeneity in ID and cleft properties into a tissue-scale model.<sup>26</sup> The broad parameter investigation performed here would have been computationally prohibitive with this more detailed model; however, we are

also investigating the role of both ion channel organization and biophysical properties on conduction in future work.

In conclusion, we investigate the role of Na<sup>+</sup> channel subpopulations with distinct biophysical properties and spatial localization on cardiac conduction. We find that ID-localized Na<sup>+</sup> channels with shifted SSA and SSI biophysical properties support the majority of burden of excitation, and contribute to faster and more robust conduction, specifically sensitivity to tissue structural changes (i.e., cleft width), gap junctional coupling, and fast pacing rates. Our work supports the hypothesis that Na<sup>+</sup> channel redistribution and biophysical properties regulation are critical mechanisms by which cardiac cells rapidly respond to perturbations to support electrical conduction.

### **Acknowledgements.**

This work was supported by the National Institutes of Health (NIH) R01HL138003.

### **Data Availability**

The simulation data is available upon reasonable request from the author (weinberg.147@osu.edu).

### **References**

1. Rivaud MR, Delmar M, Remme CA. Heritable arrhythmia syndromes associated with abnormal cardiac sodium channel function: ionic and non-ionic mechanisms. *Cardiovasc Res.* 2020;116(9):1557-1570. doi:10.1093/cvr/cvaa082
2. Abriel H. Cardiac sodium channel Nav1.5 and interacting proteins: Physiology and pathophysiology. *J Mol Cell Cardiol.* 2010;48(1):2-11. doi:10.1016/j.yjmcc.2009.08.025
3. Marchal GA, Remme CA. Subcellular diversity of Nav1.5 in cardiomyocytes: distinct functions, mechanisms and targets. *J Physiol.* Published online December 19, 2022:JP283086. doi:10.1113/JP283086
4. Veeraraghavan R, Hoeker GS, Alvarez-Laviada A, et al. The adhesion function of the sodium channel beta subunit ( $\beta$ 1) contributes to cardiac action potential propagation. *eLife.* 2018;7:e37610. doi:10.7554/eLife.37610
5. Angsutararux P, Zhu W, Voelker TL, Silva JR. Molecular Pathology of Sodium Channel Beta-Subunit Variants. *Front Pharmacol.* 2021;12:761275. doi:10.3389/fphar.2021.761275
6. Zhu W, Voelker TL, Varga Z, Schubert AR, Nerbonne JM, Silva JR. Mechanisms of noncovalent  $\beta$  subunit regulation of NaV channel gating. *J Gen Physiol.* 2017;149(8):813-831. doi:10.1085/jgp.201711802

7. Watanabe H, Darbar D, Kaiser DW, et al. Mutations in Sodium Channel  $\beta$ 1- and  $\beta$ 2-Subunits Associated With Atrial Fibrillation. *Circ Arrhythm Electrophysiol.* 2009;2(3):268-275. doi:10.1161/CIRCEP.108.779181
8. Shy D, Gillet L, Abriel H. Cardiac sodium channel NaV1.5 distribution in myocytes via interacting proteins: The multiple pool model. *Biochim Biophys Acta BBA - Mol Cell Res.* 2013;1833(4):886-894. doi:10.1016/j.bbamcr.2012.10.026
9. Petitprez S, Zmoos AF, Ogradnik J, et al. SAP97 and Dystrophin Macromolecular Complexes Determine Two Pools of Cardiac Sodium Channels Na<sub>v</sub> 1.5 in Cardiomyocytes. *Circ Res.* 2011;108(3):294-304. doi:10.1161/CIRCRESAHA.110.228312
10. Balycheva M, Faggian G, Glukhov AV, Gorelik J. Microdomain-specific localization of functional ion channels in cardiomyocytes: an emerging concept of local regulation and remodelling. *Biophys Rev.* 2015;7(1):43-62. doi:10.1007/s12551-014-0159-x
11. Lin X, Liu N, Lu J, et al. Subcellular heterogeneity of sodium current properties in adult cardiac ventricular myocytes. *Heart Rhythm.* 2011;8(12):1923-1930. doi:10.1016/j.hrthm.2011.07.016
12. Veeraraghavan R, Lin J, Hoeker GS, Keener JP, Gourdie RG, Poelzing S. Sodium channels in the Cx43 gap junction perinexus may constitute a cardiac ephapse: an experimental and modeling study. *Pflug Arch - Eur J Physiol.* 2015;467(10):2093-2105. doi:10.1007/s00424-014-1675-z
13. Gillet L, Shy D, Abriel H. Elucidating sodium channel NaV1.5 clustering in cardiac myocytes using super-resolution techniques. *Cardiovasc Res.* 2014;104(2):231-233. doi:10.1093/cvr/cvu221
14. Agullo-Pascual E, Lin X, Leo-Macias A, et al. Super-resolution imaging reveals that loss of the C-terminus of connexin43 limits microtubule plus-end capture and NaV1.5 localization at the intercalated disc. *Cardiovasc Res.* 2014;104(2):371-381. doi:10.1093/cvr/cvu195
15. Marchal GA, Jouni M, Chiang DY, et al. Targeting the Microtubule EB1-CLASP2 Complex Modulates Na<sub>v</sub> 1.5 at Intercalated Discs. *Circ Res.* 2021;129(3):349-365. doi:10.1161/CIRCRESAHA.120.318643
16. Kucera JP, Rohr S, Rudy Y. Localization of Sodium Channels in Intercalated Disks Modulates Cardiac Conduction. *Circ Res.* 2002;91(12):1176-1182. doi:10.1161/01.RES.0000046237.54156.0A
17. Mori Y, Fishman GI, Peskin CS. Ephaptic conduction in a cardiac strand model with 3D electrodiffusion. *Proc Natl Acad Sci U S A.* 2008;105(17):6463-6468. doi:10.1073/pnas.0801089105

18. Lin J, Keener JP. Modeling electrical activity of myocardial cells incorporating the effects of ephaptic coupling. *Proc Natl Acad Sci U S A*. 2010;107(49):20935-20940. doi:10.1073/pnas.1010154107
19. Rhett JM, Veeraraghavan R, Poelzing S, Gourdie RG. The perinexus: Sign-post on the path to a new model of cardiac conduction? *Trends Cardiovasc Med*. 2013;23(6):222-228. doi:10.1016/j.tcm.2012.12.005
20. Anastassiou CA, Perin R, Markram H, Koch C. Ephaptic coupling of cortical neurons. *Nat Neurosci*. 2011;14(2):217-223. doi:10.1038/nn.2727
21. Sperelakis N. The possibility of propagation between myocardial cells not connected by low-resistance pathways. *Adv Exp Med Biol*. 1983;161:1-23. doi:10.1007/978-1-4684-4472-8\_1
22. Sperelakis N, Mann JE. Evaluation of electric field changes in the cleft between excitable cells. *J Theor Biol*. 1977;64(1):71-96. doi:10.1016/0022-5193(77)90114-x
23. Sperelakis N, McConnell K. Electric field interactions between closely abutting excitable cells. *IEEE Eng Med Biol Mag Q Mag Eng Med Biol Soc*. 2002;21(1):77-89. doi:10.1109/51.993199
24. Pertsov AM, Medvinskii AB. Electric coupling in cells without highly permeable cell contacts. *Biofizika*. 1976;21(4):698-670.
25. Nowak MB, Veeraraghavan R, Poelzing S, Weinberg SH. Cellular Size, Gap Junctions, and Sodium Channel Properties Govern Developmental Changes in Cardiac Conduction. *Front Physiol*. 2021;12:731025. doi:10.3389/fphys.2021.731025
26. Moise N, Struckman HL, Dagher C, Veeraraghavan R, Weinberg SH. Intercalated disk nanoscale structure regulates cardiac conduction. *J Gen Physiol*. 2021;153(8):e202112897. doi:10.1085/jgp.202112897
27. Weinberg SH. Ephaptic coupling rescues conduction failure in weakly coupled cardiac tissue with voltage-gated gap junctions. *Chaos Interdiscip J Nonlinear Sci*. 2017;27(9):093908. doi:10.1063/1.4999602
28. Nowak MB, Poelzing S, Weinberg SH. Mechanisms underlying age-associated manifestation of cardiac sodium channel gain-of-function. *J Mol Cell Cardiol*. 2021;153:60-71. doi:10.1016/j.yjmcc.2020.12.008
29. Nowak MB, Greer-Short A, Wan X, et al. Intercellular Sodium Regulates Repolarization in Cardiac Tissue with Sodium Channel Gain of Function. *Biophys J*. 2020;118(11):2829-2843. doi:10.1016/j.bpj.2020.04.014



30. Greer-Short A, George SA, Poelzing S, Weinberg SH. Revealing the Concealed Nature of Long-QT Type 3 Syndrome. *Circ Arrhythm Electrophysiol.* 2017;10(2). doi:10.1161/CIRCEP.116.004400
31. Yu JK, Liang JA, Weinberg SH, Trayanova NA. Computational modeling of aberrant electrical activity following remuscularization with intramyocardially injected pluripotent stem cell-derived cardiomyocytes. *J Mol Cell Cardiol.* 2022;162:97-109. doi:10.1016/j.yjmcc.2021.08.011
32. Veeraraghavan R, Lin J, Keener JP, Gourdie R, Poelzing S. Potassium channels in the Cx43 gap junction perinexus modulate ephaptic coupling: an experimental and modeling study. *Pflugers Arch.* 2016;468(10):1651-1661. doi:10.1007/s00424-016-1861-2
33. Lin J, Keener JP. Ephaptic coupling in cardiac myocytes. *IEEE Trans Biomed Eng.* 2013;60(2):576-582. doi:10.1109/TBME.2012.2226720
34. Lin J, Keener JP. Microdomain effects on transverse cardiac propagation. *Biophys J.* 2014;106(4):925-931. doi:10.1016/j.bpj.2013.11.1117
35. Ly C, Weinberg SH. Automaticity in ventricular myocyte cell pairs with ephaptic and gap junction coupling. *Chaos Interdiscip J Nonlinear Sci.* 2022;32(3):033123. doi:10.1063/5.0085291
36. Poelzing S, Weinberg SH, Keener JP. Initiation and entrainment of multicellular automaticity via diffusion limited extracellular domains. *Biophys J.* 2021;120(23):5279-5294. doi:10.1016/j.bpj.2021.10.034
37. Hand PE, Peskin CS. Homogenization of an electrophysiological model for a strand of cardiac myocytes with gap-junctional and electric-field coupling. *Bull Math Biol.* 2010;72(6):1408-1424. doi:10.1007/s11538-009-9499-2
38. Wei N, Mori Y, Tolkacheva EG. The dual effect of ephaptic coupling on cardiac conduction with heterogeneous expression of connexin 43. *J Theor Biol.* 2016;397:103-114. doi:10.1016/j.jtbi.2016.02.029
39. Wei N, Tolkacheva EG. Mechanisms of arrhythmia termination during acute myocardial ischemia: Role of ephaptic coupling and complex geometry of border zone. *PLoS One.* 2022;17(3):e0264570. doi:10.1371/journal.pone.0264570
40. Hichri E, Abriel H, Kucera JP. Distribution of cardiac sodium channels in clusters potentiates ephaptic interactions in the intercalated disc: Ephaptic effects in intercalated discs. *J Physiol.* 2018;596(4):563-589. doi:10.1113/JP275351
41. Ivanovic E, Kucera JP. Tortuous Cardiac Intercalated Discs Modulate Ephaptic Coupling. *Cells.* 2022;11(21):3477. doi:10.3390/cells11213477

42. Ivanovic E, Kucera JP. Localization of Na<sup>+</sup> channel clusters in narrowed perinexi of gap junctions enhances cardiac impulse transmission via ephaptic coupling: a model study. *J Physiol*. 2021;599(21):4779-4811. doi:10.1113/JP282105
43. Luo CH, Rudy Y. A model of the ventricular cardiac action potential. Depolarization, repolarization, and their interaction. *Circ Res*. 1991;68(6):1501-1526. doi:10.1161/01.res.68.6.1501
44. Wu X, Hoeker GS, Blair GA, et al. Hyponatremia and intercalated disc edema synergistically exacerbate long-QT syndrome type 3 phenotype. *Am J Physiol-Heart Circ Physiol*. 2021;321(6):H1042-H1055. doi:10.1152/ajpheart.00366.2021
45. Desplantez T, Dupont E, Severs NJ, Weingart R. Gap Junction Channels and Cardiac Impulse Propagation. *J Membr Biol*. 2007;218(1-3):13-28. doi:10.1007/s00232-007-9046-8
46. Kwak BrendaR, Jongsma HaboJ. Regulation of cardiac gap junction channel permeability and conductance by several phosphorylating conditions. *Mol Cell Biochem*. 1996;157(1-2). doi:10.1007/BF00227885
47. McCain ML, Desplantez T, Geisse NA, et al. Cell-to-cell coupling in engineered pairs of rat ventricular cardiomyocytes: relation between Cx43 immunofluorescence and intercellular electrical conductance. *Am J Physiol-Heart Circ Physiol*. 2012;302(2):H443-H450. doi:10.1152/ajpheart.01218.2010
48. Moreno AP, Rook MB, Fishman GI, Spray DC. Gap junction channels: distinct voltage-sensitive and -insensitive conductance states. *Biophys J*. 1994;67(1):113-119. doi:10.1016/S0006-3495(94)80460-6
49. Valiunas V, Beyer EC, Brink PR. Cardiac Gap Junction Channels Show Quantitative Differences in Selectivity. *Circ Res*. 2002;91(2):104-111. doi:10.1161/01.RES.0000025638.24255.AA
50. Verheule S, van Kempen MJA, Welscher PHJA te, Kwak BR, Jongsma HJ. Characterization of Gap Junction Channels in Adult Rabbit Atrial and Ventricular Myocardium. *Circ Res*. 1997;80(5):673-681. doi:10.1161/01.RES.80.5.673
51. White RL, Doeller JE, Verselis VK, Wittenberg BA. Gap junctional conductance between pairs of ventricular myocytes is modulated synergistically by H<sup>+</sup> and Ca<sup>++</sup>. *J Gen Physiol*. 1990;95(6):1061-1075. doi:10.1085/jgp.95.6.1061
52. Nielsen MS, Nygaard Axelsen L, Sorgen PL, Verma V, Delmar M, Holstein-Rathlou N. Gap Junctions. In: Terjung R, ed. *Comprehensive Physiology*. 1st ed. Wiley; 2012:1981-2035. doi:10.1002/cphy.c110051

53. Rudisuli, A A, Weingart R. Electrical properties of gap junction channels in guinea-pig ventricular cell pairs revealed by exposure to heptanol. *Pflügers Arch Eur J Physiol*. 1989;415(1):12-21. doi:10.1007/BF00373136
54. Weingart R. Electrical properties of the nexal membrane studied in rat ventricular cell pairs. *J Physiol*. 1986;370(1):267-284. doi:10.1113/jphysiol.1986.sp015934
55. Wittenberg BA, White RL, Ginzberg RD, Spray DC. Effect of calcium on the dissociation of the mature rat heart into individual and paired myocytes: electrical properties of cell pairs. *Circ Res*. 1986;59(2):143-150. doi:10.1161/01.RES.59.2.143
56. Rivaud MR, Agullo-Pascual E, Lin X, et al. Sodium Channel Remodeling in Subcellular Microdomains of Murine Failing Cardiomyocytes. *J Am Heart Assoc*. 2017;6(12):e007622. doi:10.1161/JAHA.117.007622
57. Tarasov M, Struckman HL, Olgar Y, et al. NaV1.6 dysregulation within myocardial T-tubules by D96V calmodulin enhances proarrhythmic sodium and calcium mishandling. *J Clin Invest*. Published online February 23, 2023:e152071. doi:10.1172/JCI152071
58. Westenbroek RE, Bischoff S, Fu Y, Maier SKG, Catterall WA, Scheuer T. Localization of sodium channel subtypes in mouse ventricular myocytes using quantitative immunocytochemistry. *J Mol Cell Cardiol*. 2013;64:69-78. doi:10.1016/j.yjmcc.2013.08.004
59. Shy D, Gillet L, Ogrodnik J, et al. PDZ domain-binding motif regulates cardiomyocyte compartment-specific NaV1.5 channel expression and function. *Circulation*. 2014;130(2):147-160. doi:10.1161/CIRCULATIONAHA.113.007852
60. Bers DM, Despa S, Bossuyt J. Regulation of Ca<sup>2+</sup> and Na<sup>+</sup> in normal and failing cardiac myocytes. *Ann N Y Acad Sci*. 2006;1080:165-177. doi:10.1196/annals.1380.015
61. Bögeholz N, Pauls P, Bauer BK, et al. Suppression of Early and Late Afterdepolarizations by Heterozygous Knockout of the Na<sup>+</sup>/Ca<sup>2+</sup> Exchanger in a Murine Model. *Circ Arrhythm Electrophysiol*. 2015;8(5):1210-1218. doi:10.1161/CIRCEP.115.002927
62. Bögeholz N, Pauls P, Kaese S, et al. Triggered activity in atrial myocytes is influenced by Na<sup>+</sup>/Ca<sup>2+</sup> exchanger activity in genetically altered mice. *J Mol Cell Cardiol*. 2016;101:106-115. doi:10.1016/j.yjmcc.2016.11.004
63. Qu Z, Garfinkel A, Chen PS, Weiss JN. Mechanisms of discordant alternans and induction of reentry in simulated cardiac tissue. *Circulation*. 2000;102(14):1664-1670. doi:10.1161/01.cir.102.14.1664
64. Weiss JN, Karma A, Shiferaw Y, Chen PS, Garfinkel A, Qu Z. From pulsus to pulseless: the saga of cardiac alternans. *Circ Res*. 2006;98(10):1244-1253. doi:10.1161/01.RES.0000224540.97431.f0

65. Choi BR, Jang W, Salama G. Spatially discordant voltage alternans cause wavebreaks in ventricular fibrillation. *Heart Rhythm*. 2007;4(8):1057-1068.  
doi:10.1016/j.hrthm.2007.03.037
66. Dhamoon AS, Jalife J. The inward rectifier current (IK1) controls cardiac excitability and is involved in arrhythmogenesis. *Heart Rhythm*. 2005;2(3):316-324.  
doi:10.1016/j.hrthm.2004.11.012
